# Supplementary material
Source: PubMed Central journal article supplement (PMC6296442)
Supplement: NIHMS80704-supplement-Suppl_Figures.pdf [file NIHMS80704-supplement-Suppl_Figures.pdf]

# Supplementary Figure 1

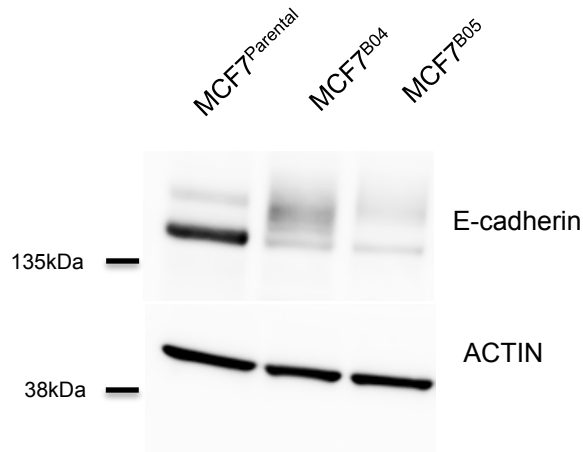

# Supplementary Figure 2

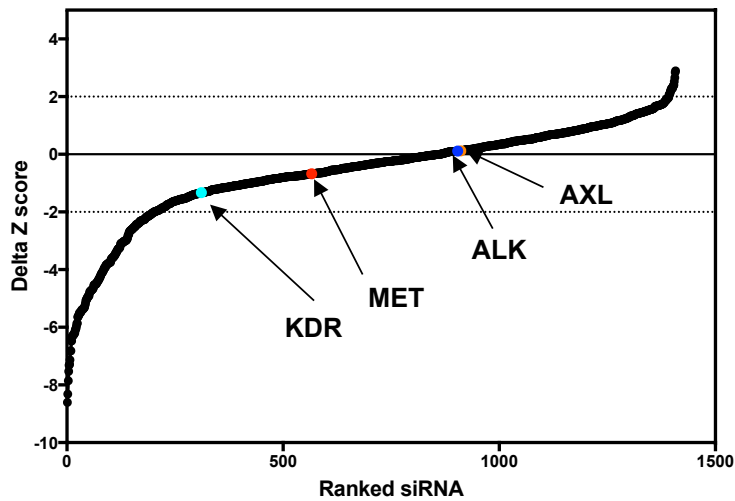

# Supplementary Figure 3

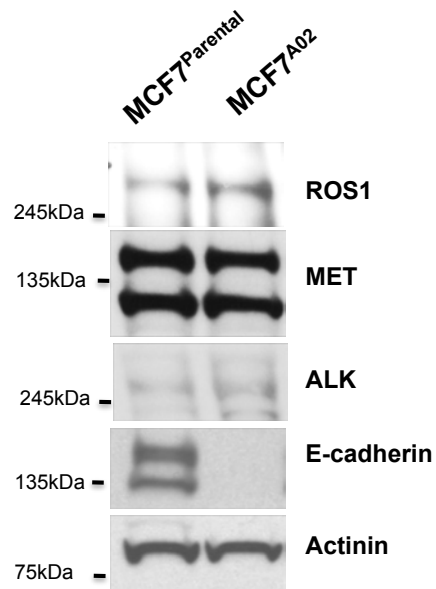

# Supplementary Figure 4

**A**

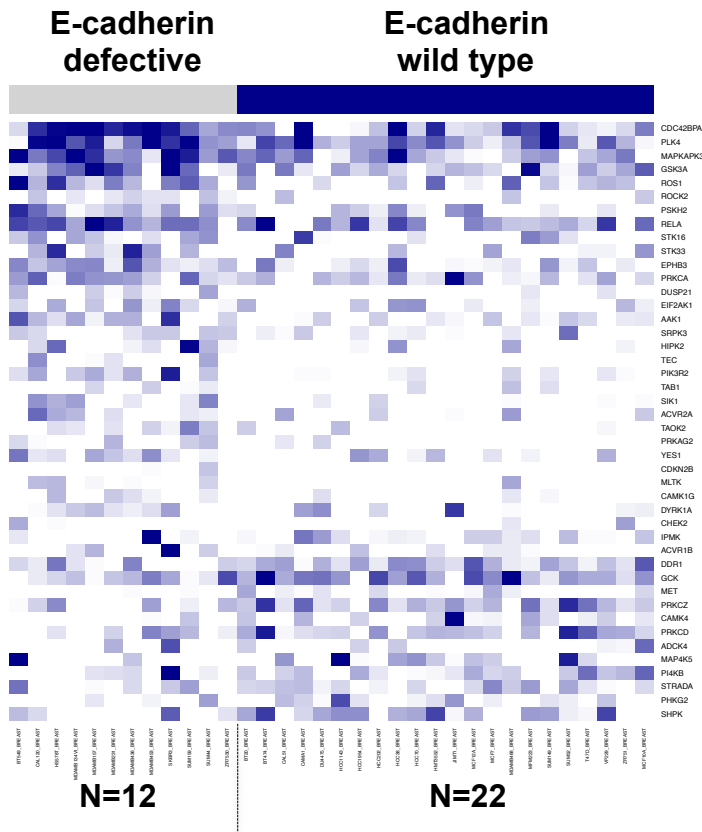

**B**

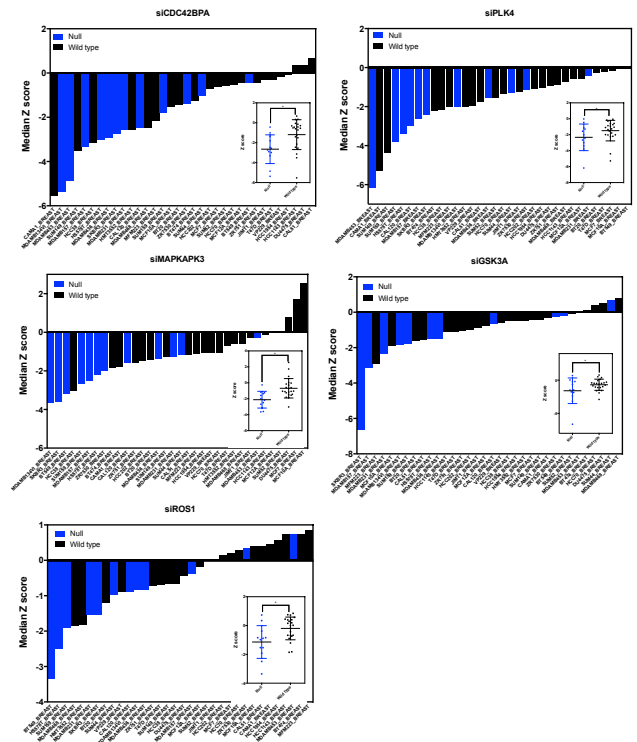

# Supplementary Figure 5

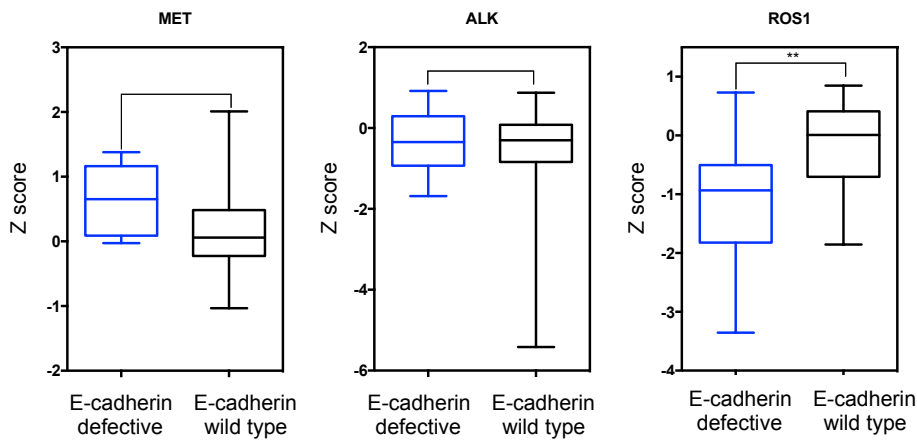

# Supplementary Figure 6

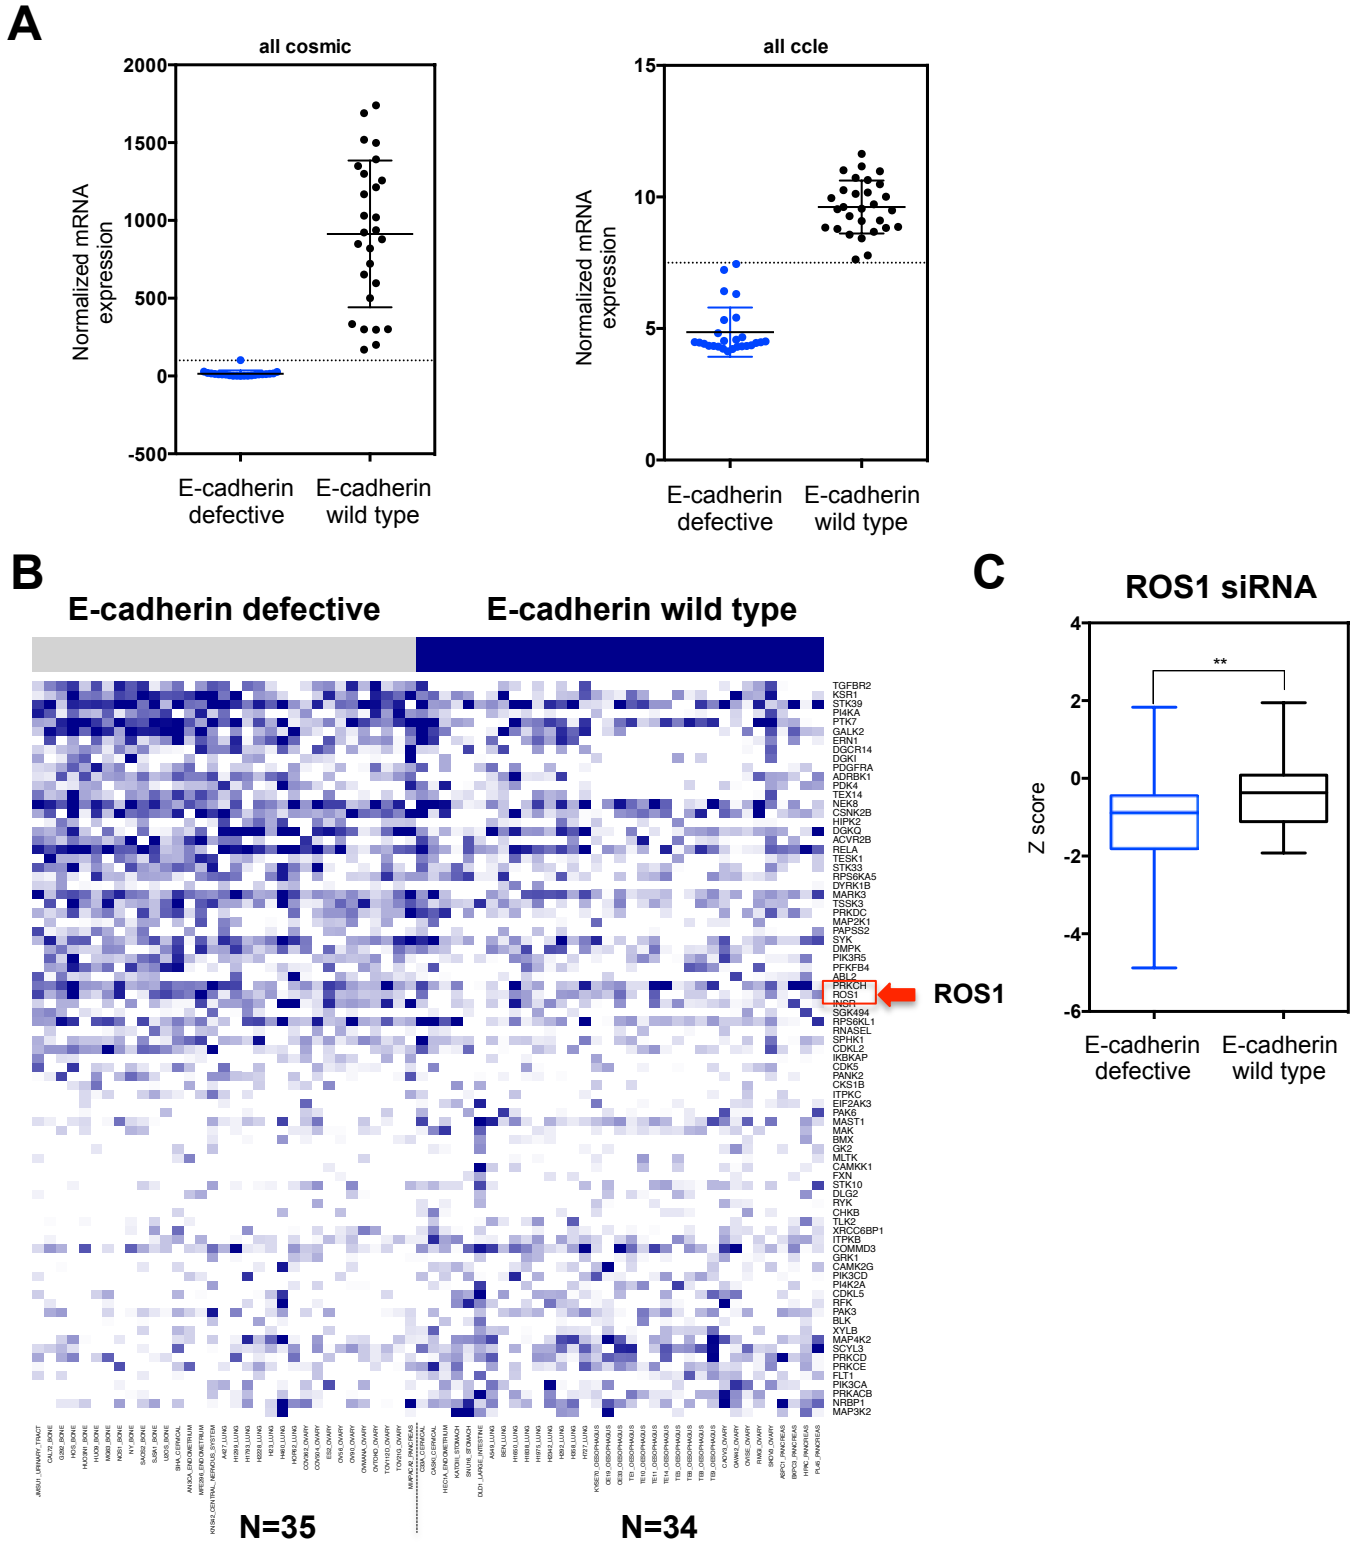

# Supplementary Figure 7

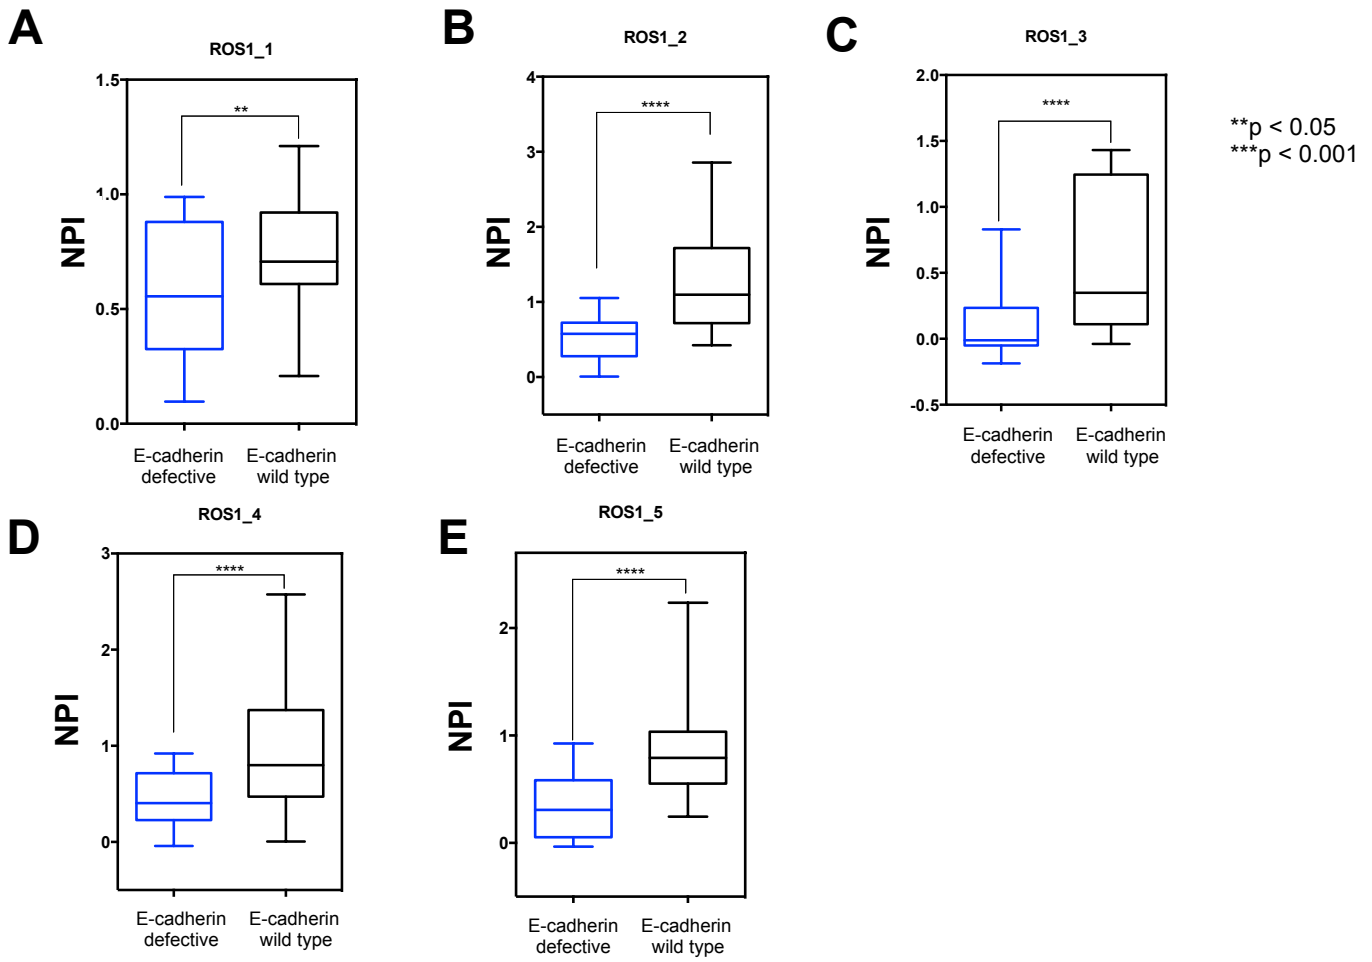

# Supplementary Figure 8

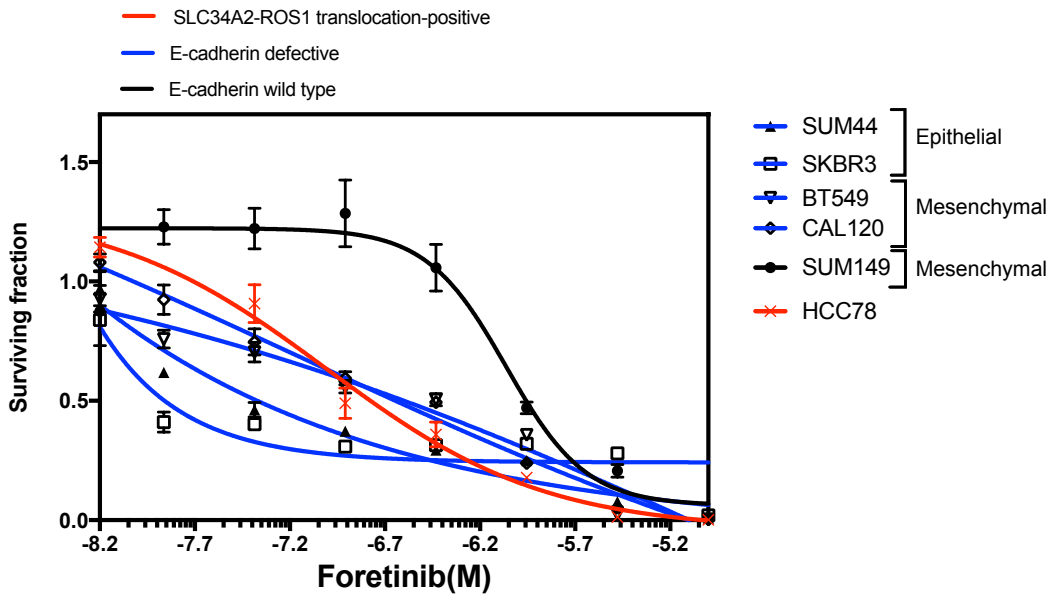

# Supplementary Figure 9

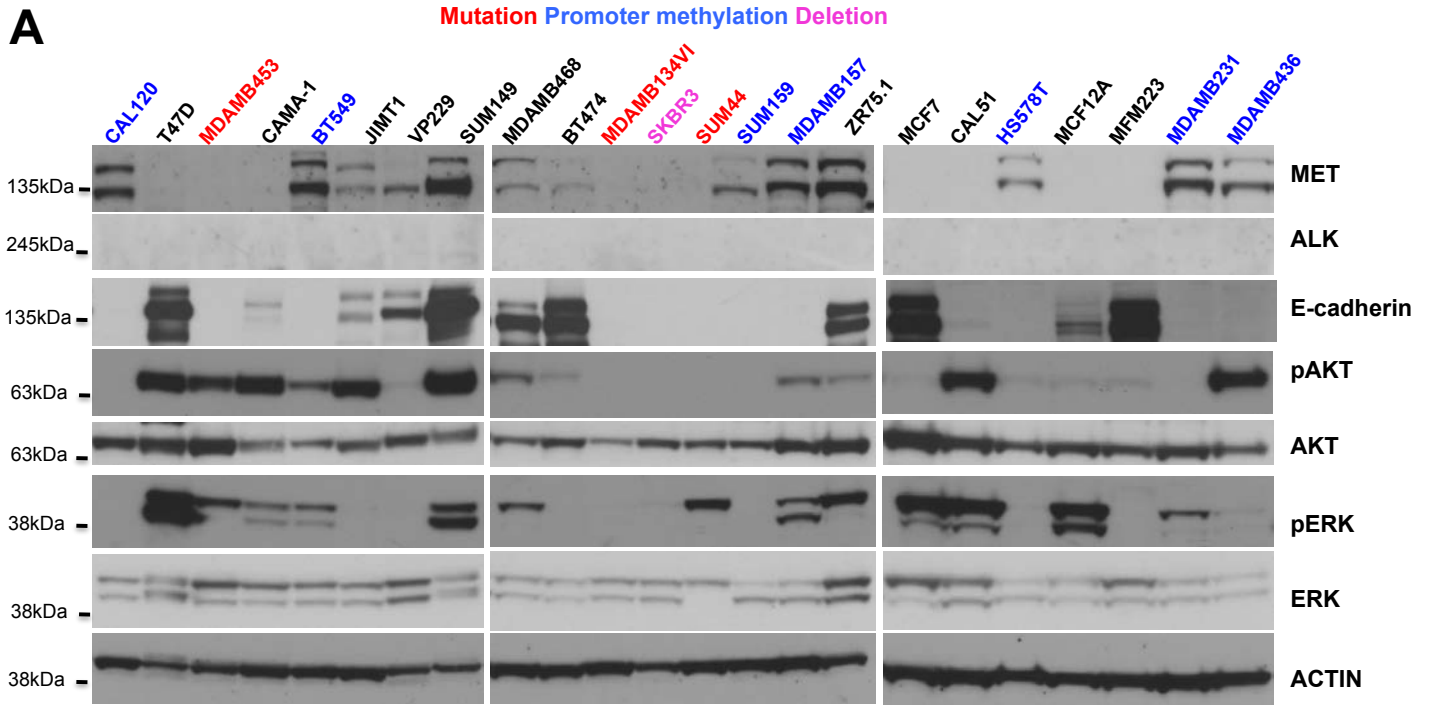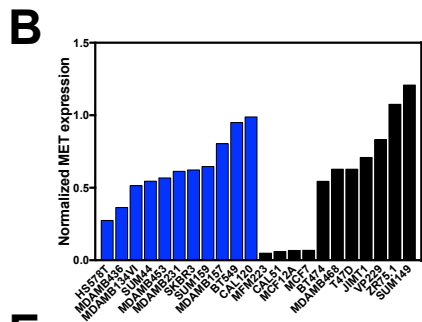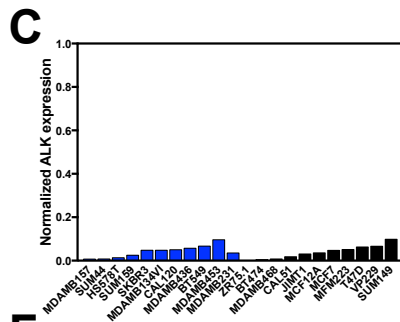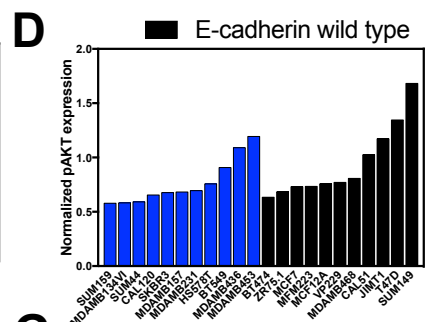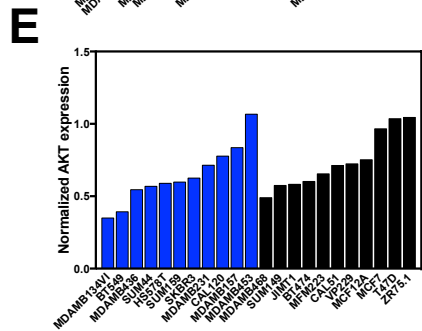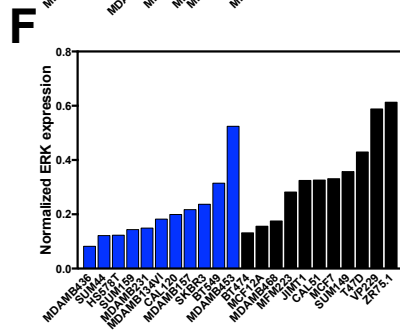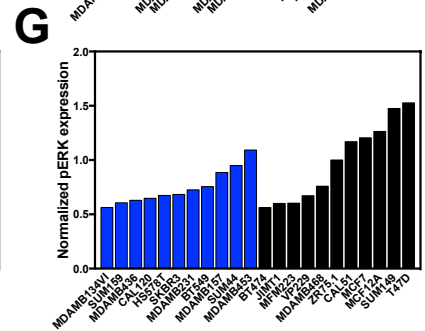

# Supplementary Figure 10

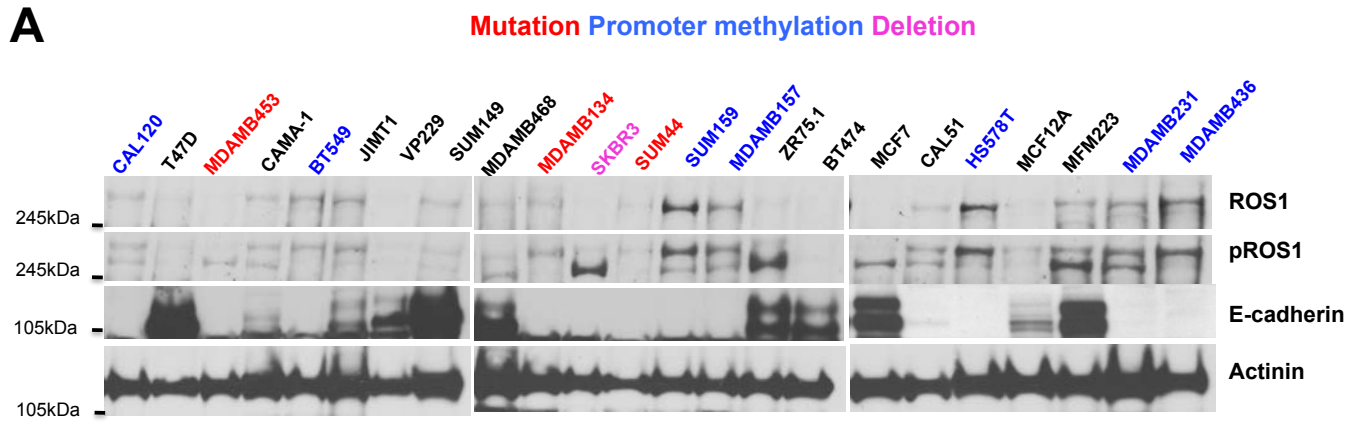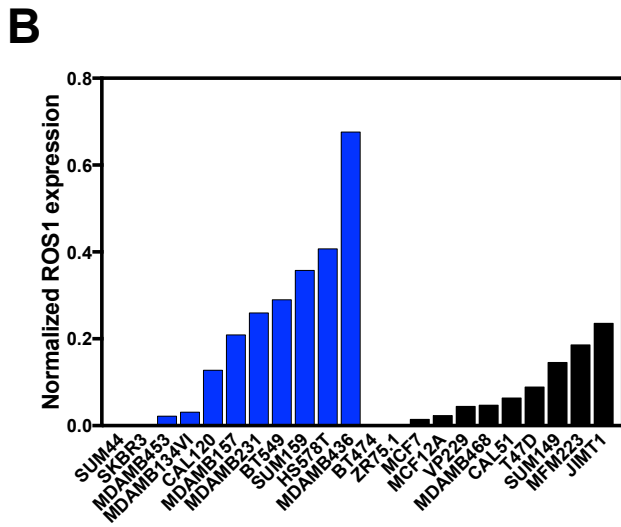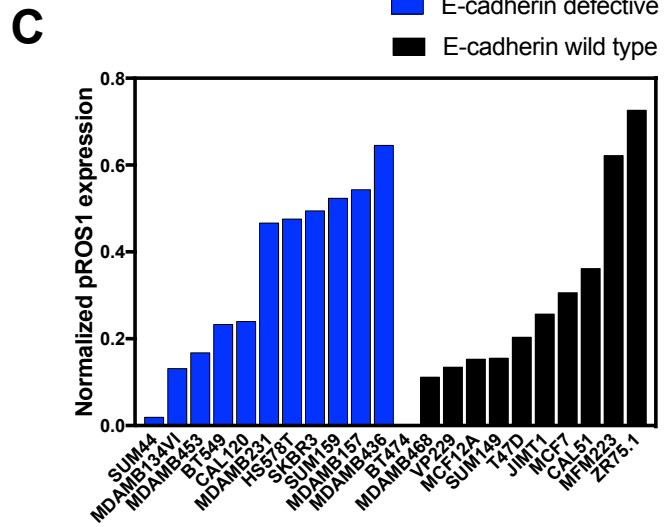

# Supplementary Figure 11

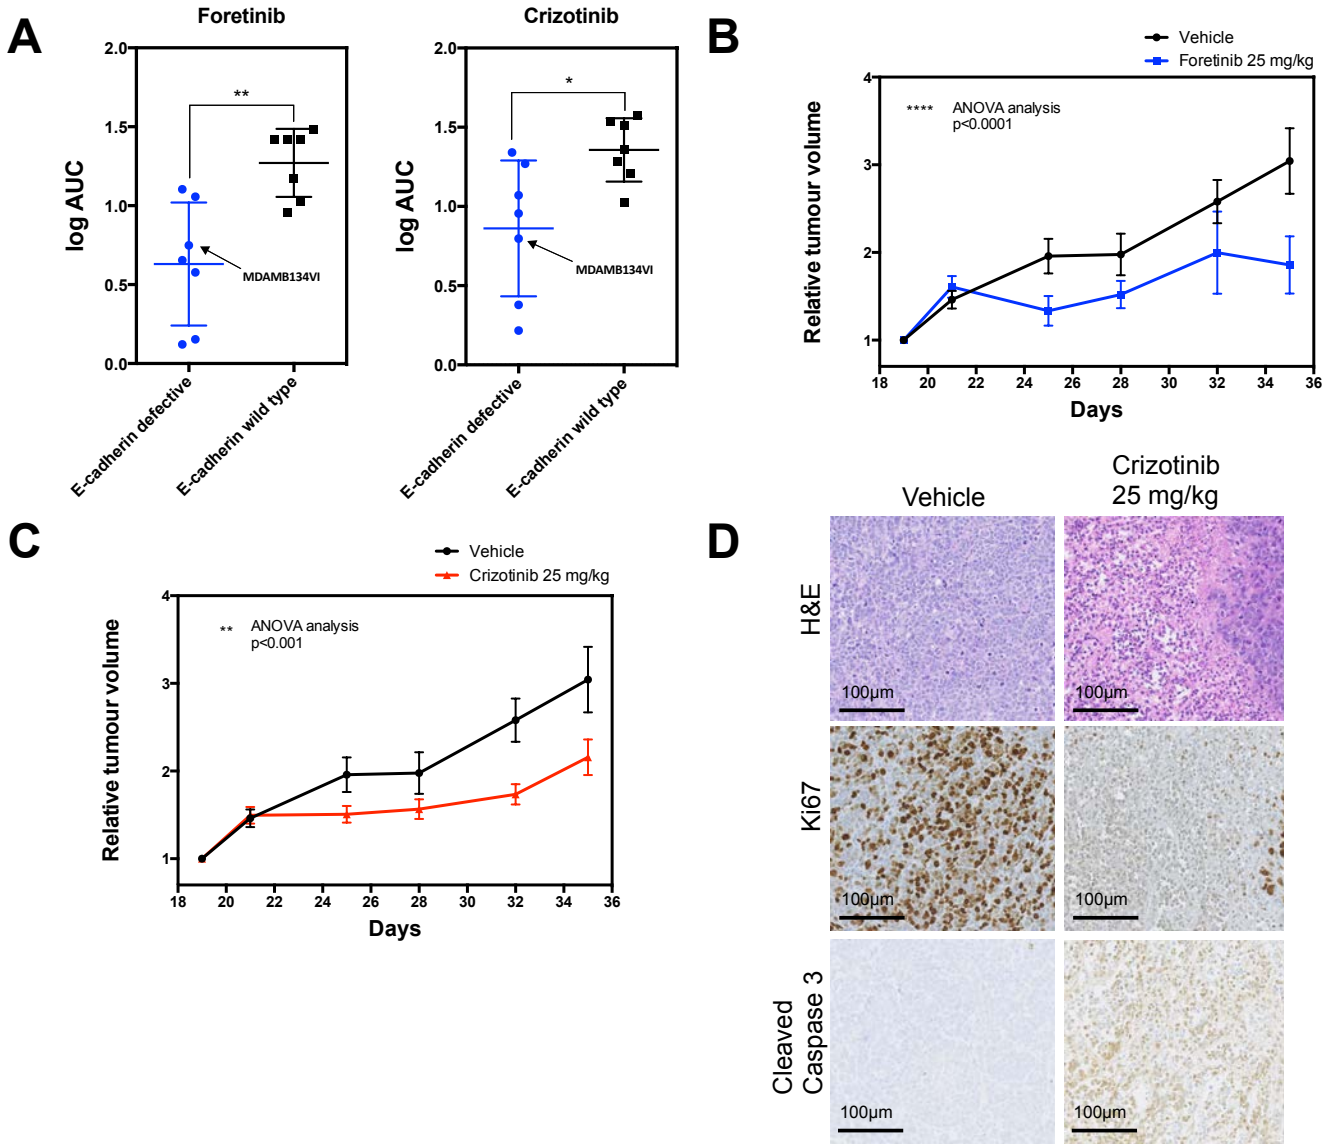

# Supplementary Figure 12

**A**

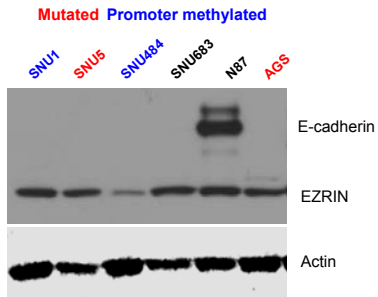

**B**

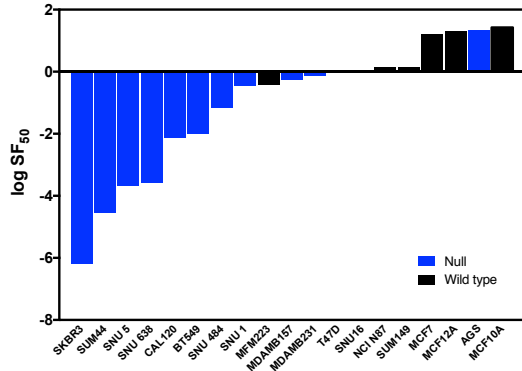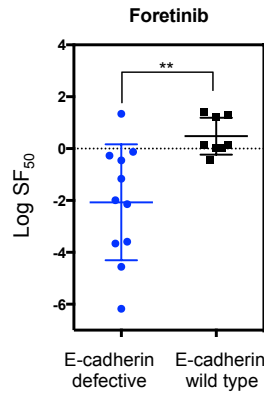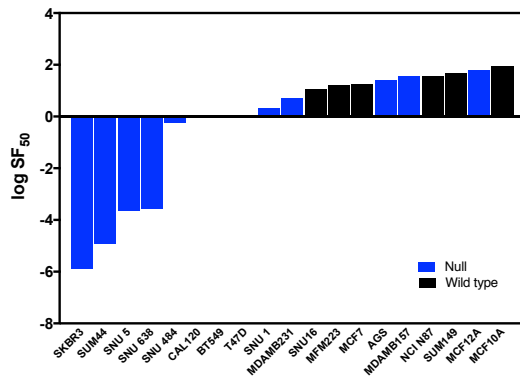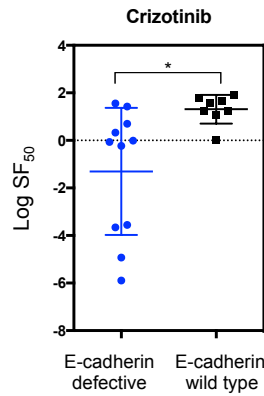

**C**

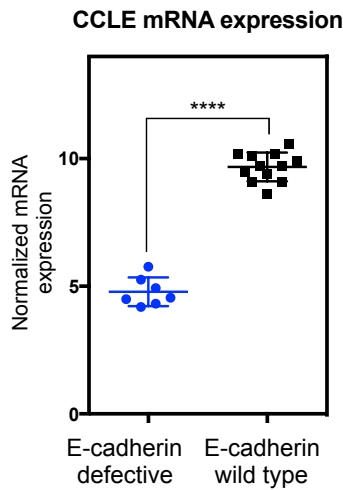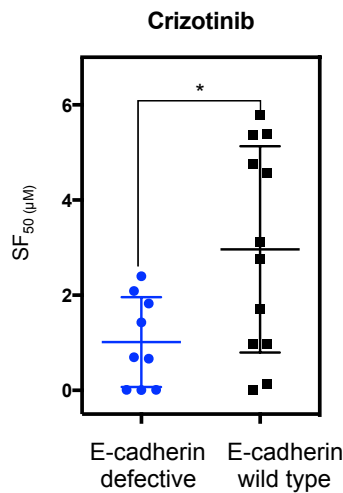



# Supplementary Figure 13

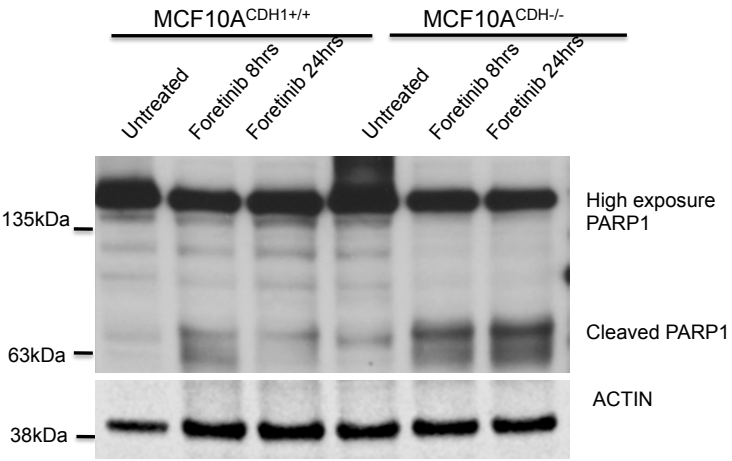

# Supplementary Figure 14

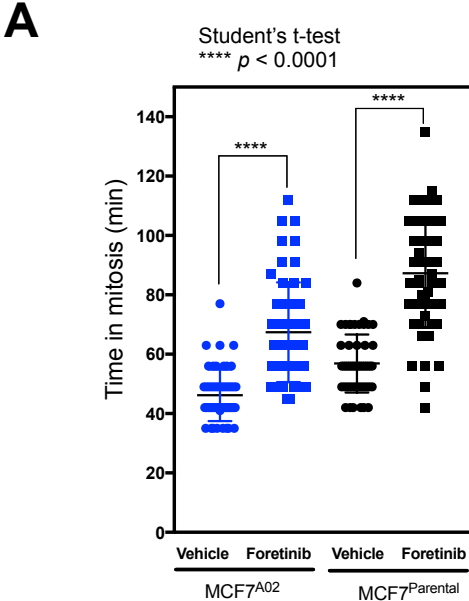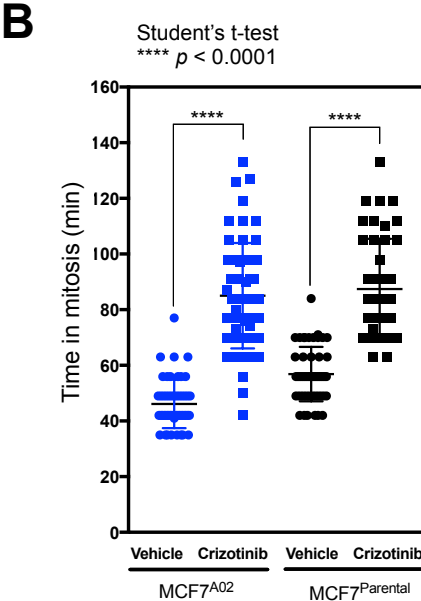

# Supplementary Figure 15

**A**

**MCF7<sup>A02</sup> vehicle**

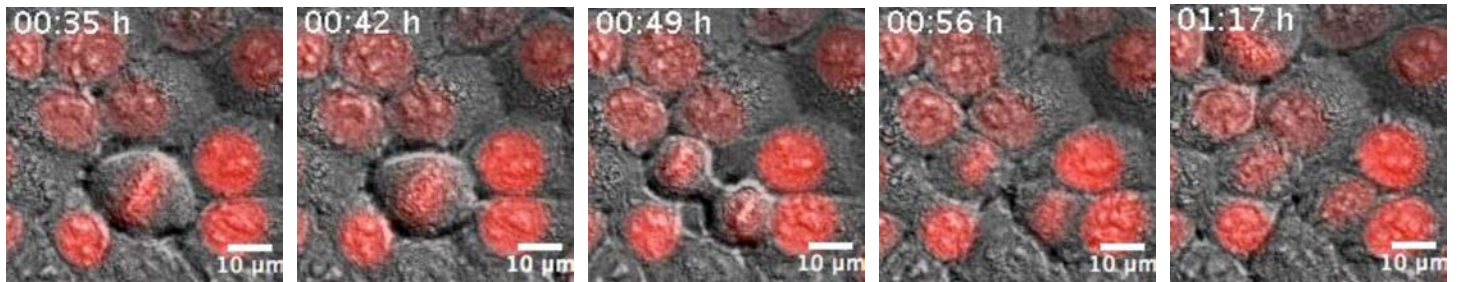

**B**

**MCF7<sup>A02</sup> foretinib**

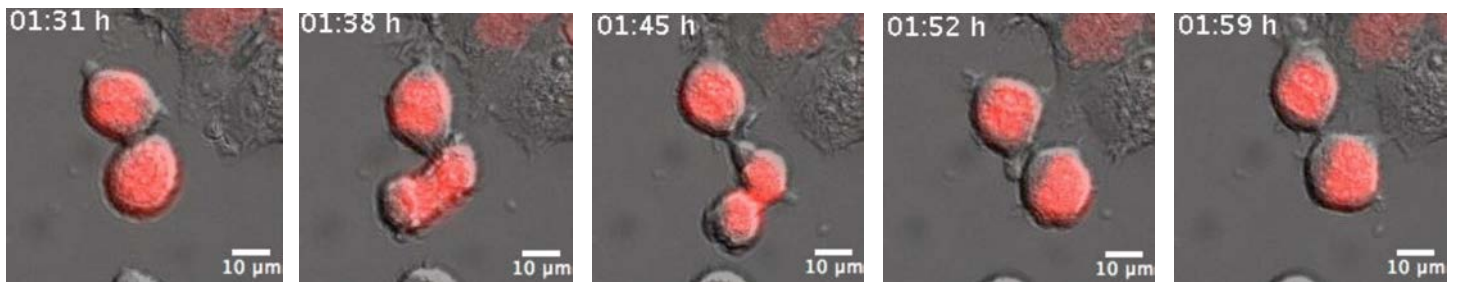

**C**

**MCF7<sup>A02</sup> foretinib**

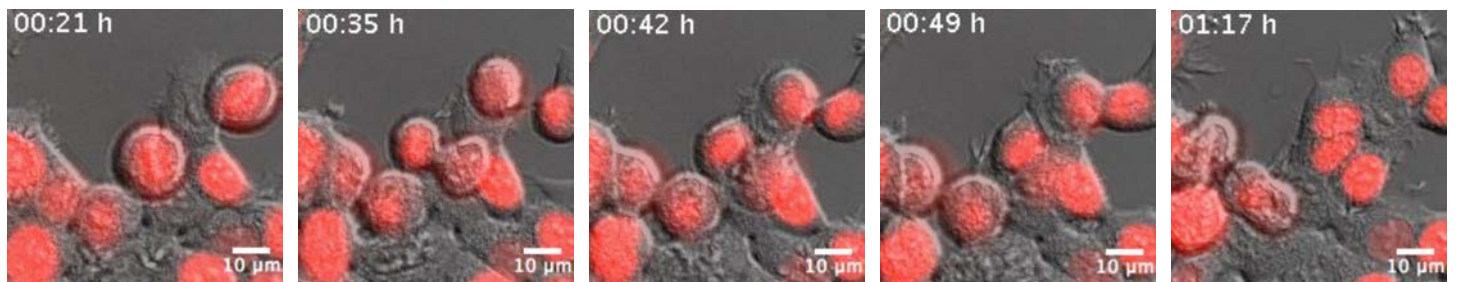

**D**

**MCF7<sup>A02</sup> crizotinib**

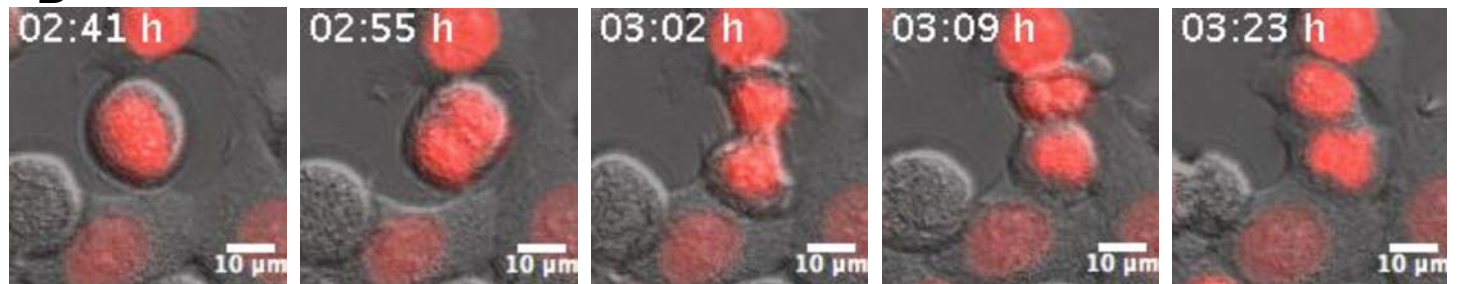

**E**

**MCF7<sup>A02</sup> crizotinib**

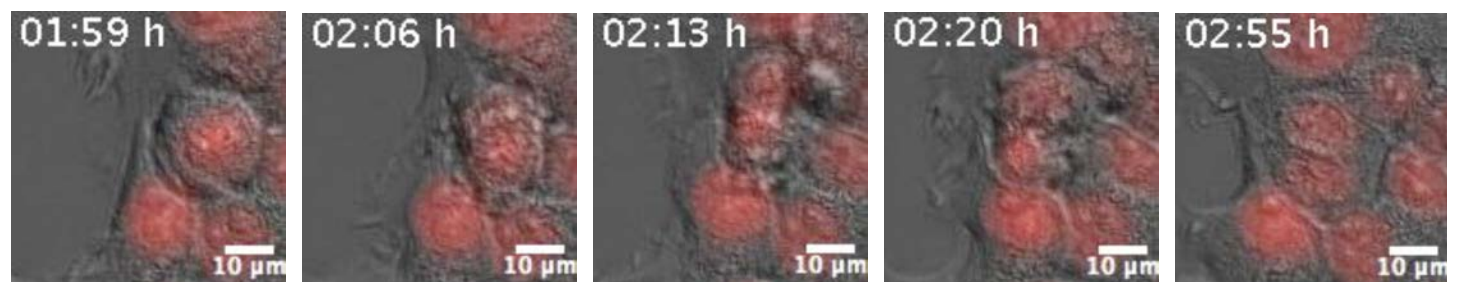

# Supplementary Figure 16

**A**

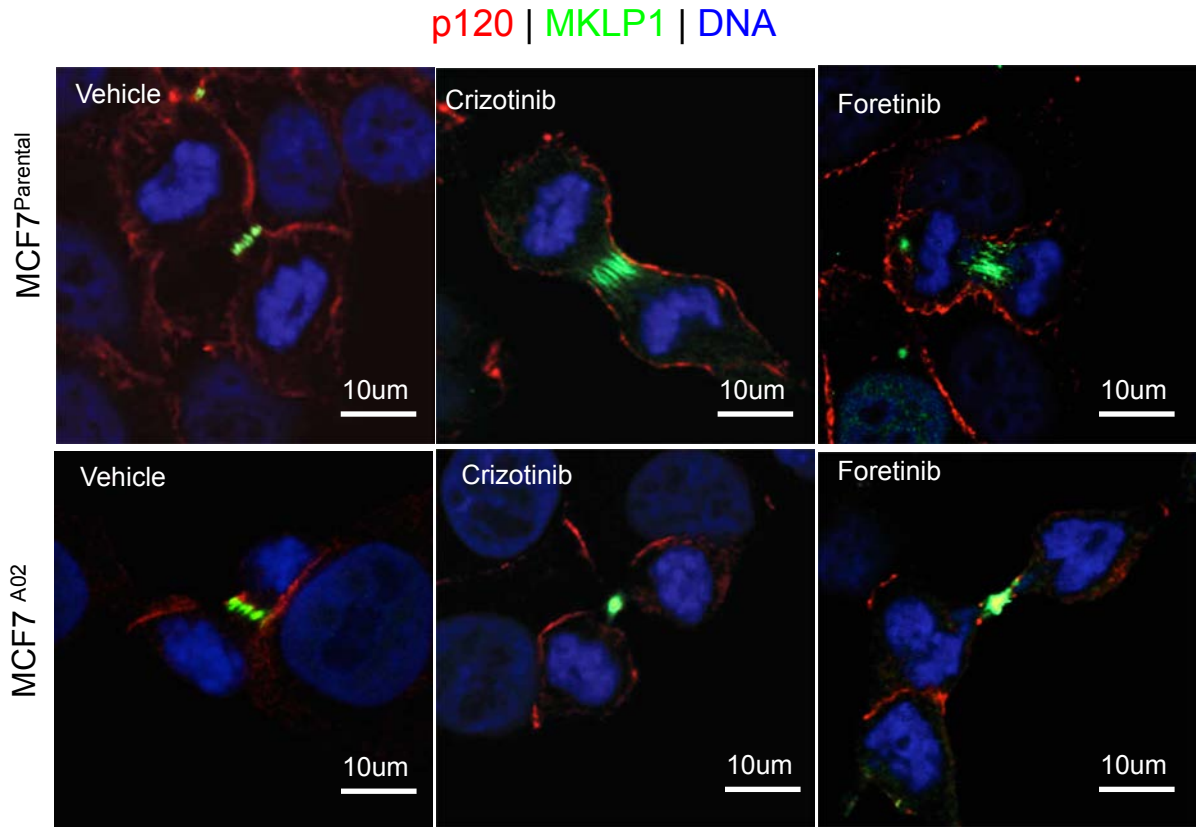

**B**

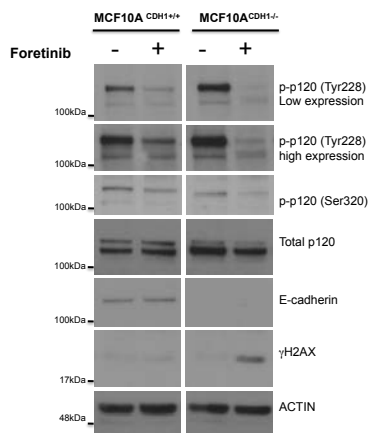

# Supplementary Figure 17

**A**

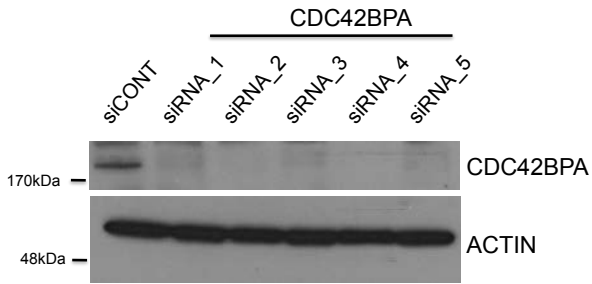

**B**

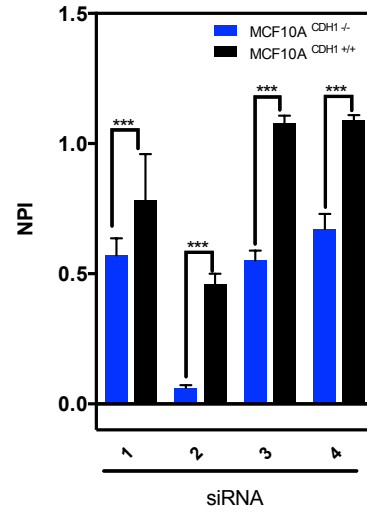

**C**

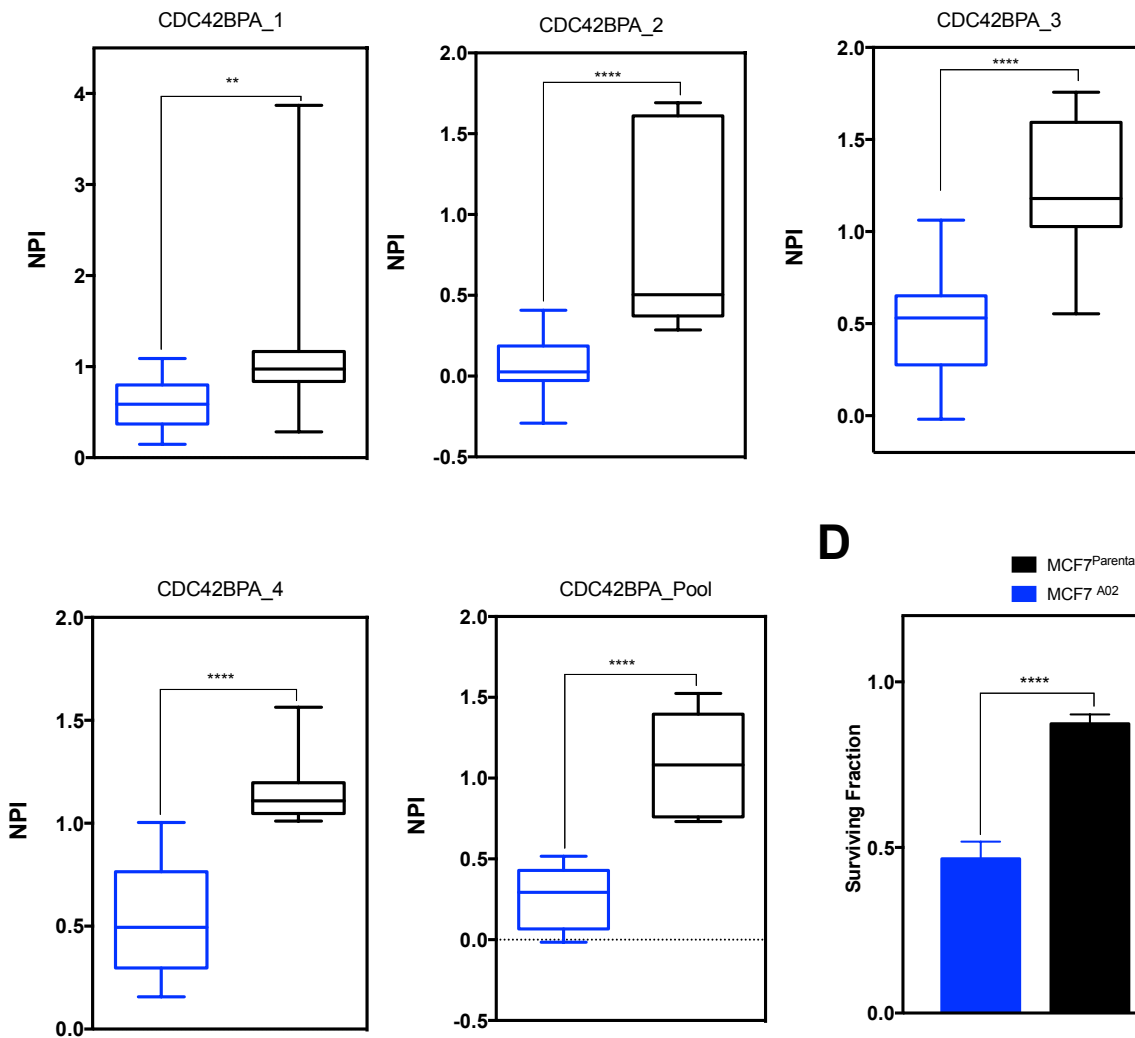

**D**

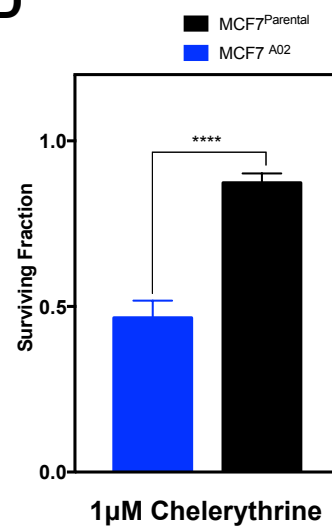

# Supplementary Figure 18

**A**

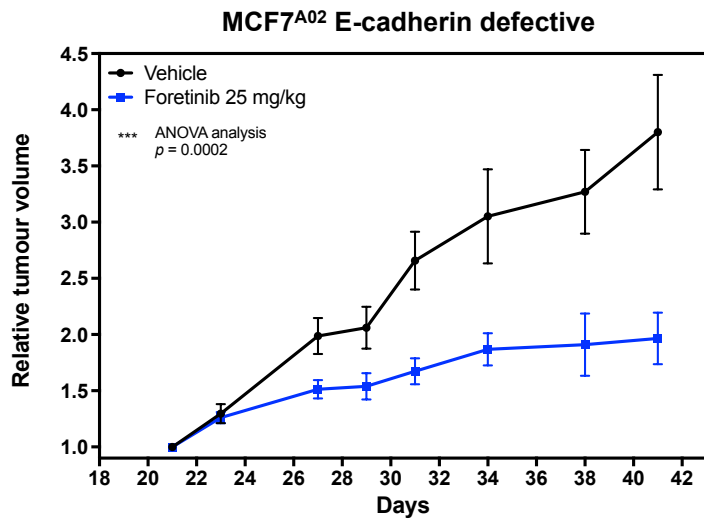

**B**

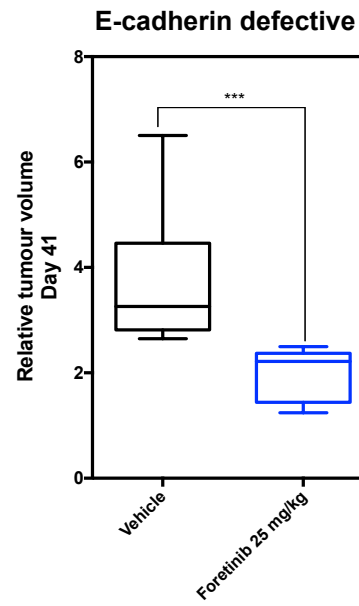

**C**

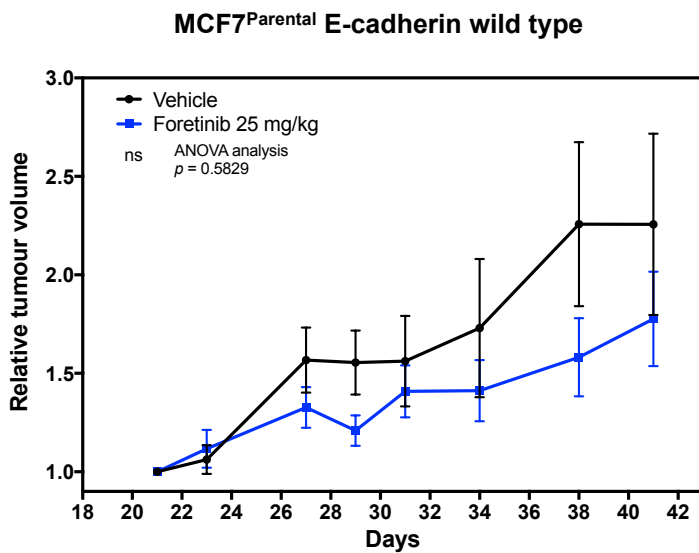

**D**

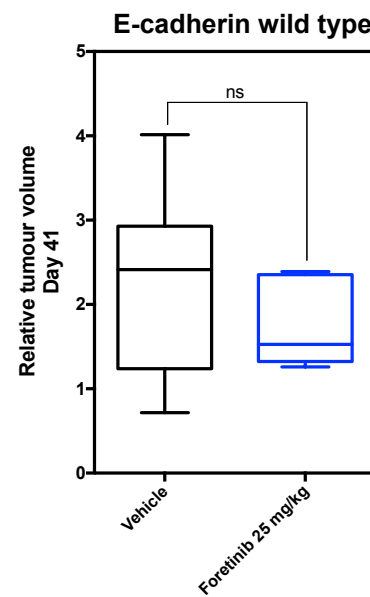

**E**

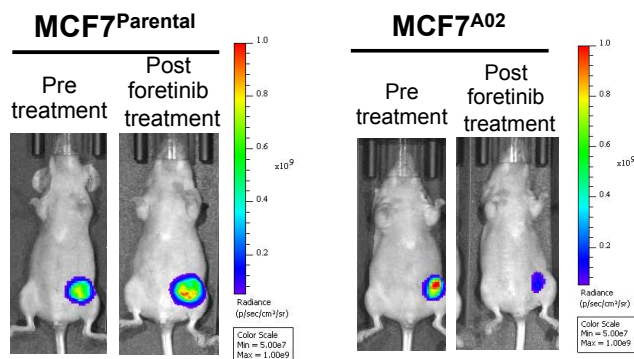

# Supplementary Figure 19

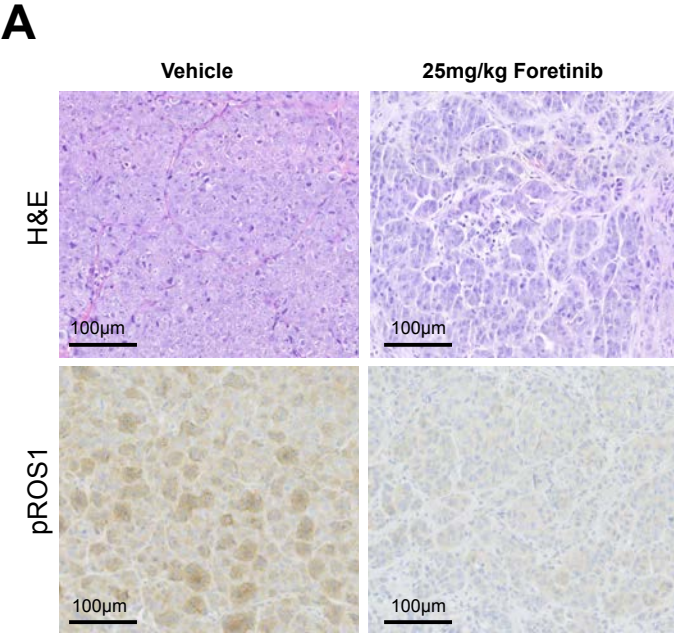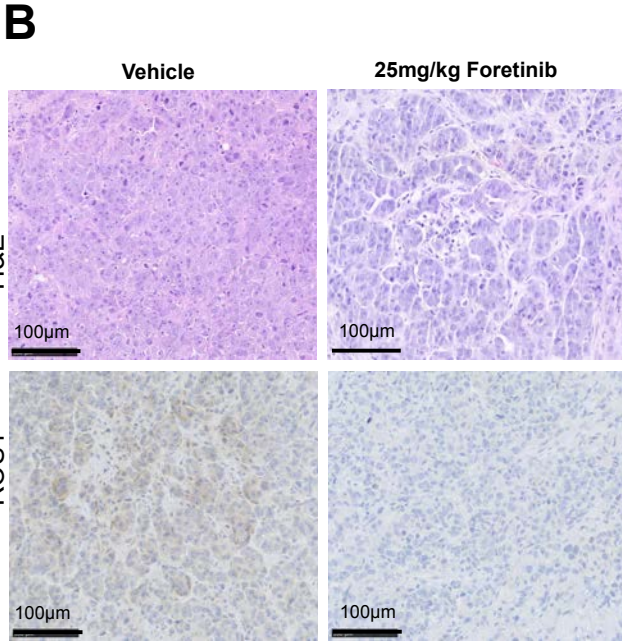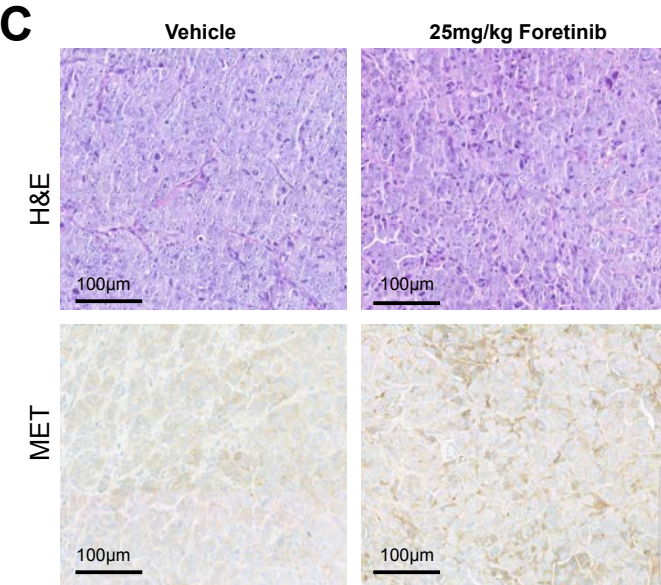

# Supplementary Figure 20

Uncropped western blots  
Fig. 1A

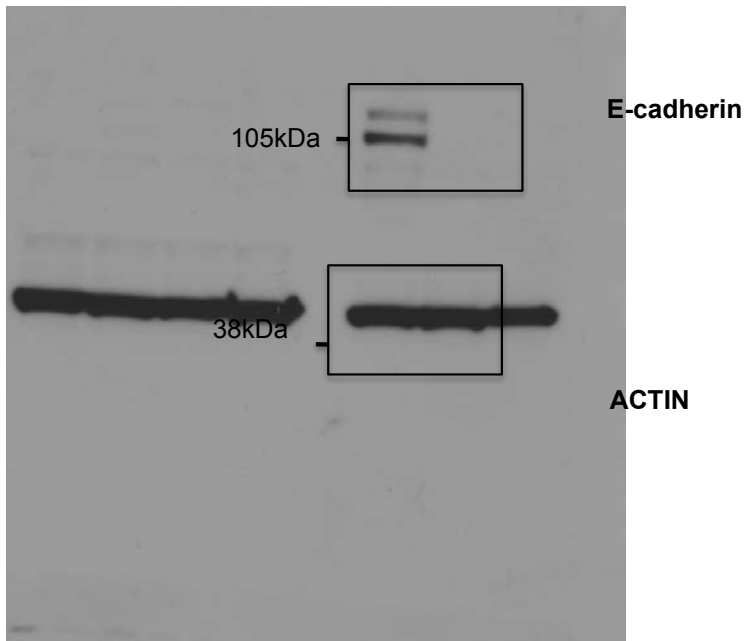

Uncropped western blots  
Fig. 1F

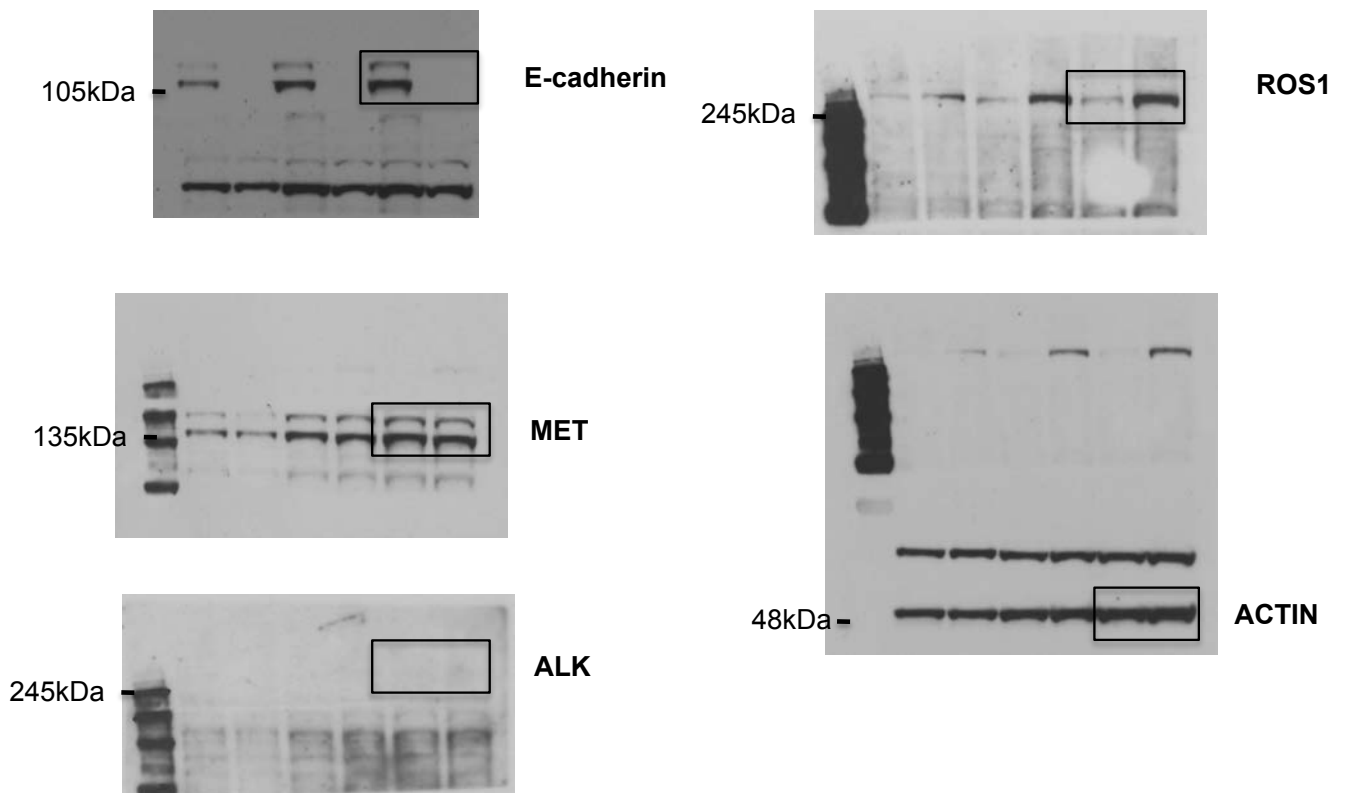



# Supplementary Figure 20

Uncropped western blots  
Fig. 1H

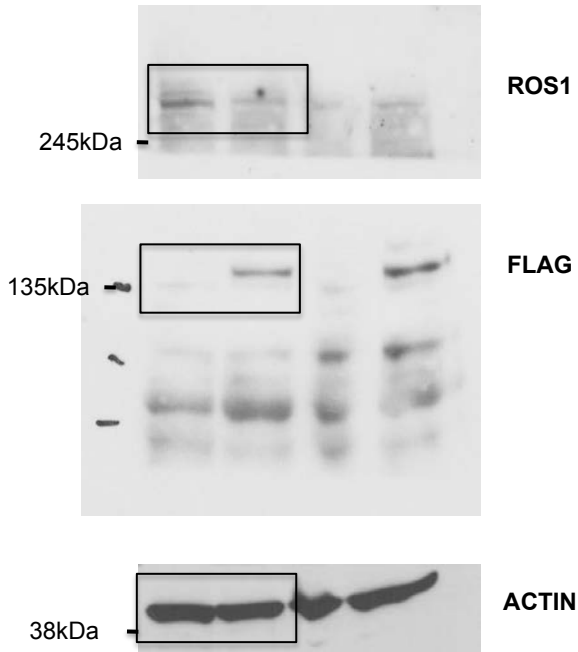

Uncropped western blots  
Fig. 2A

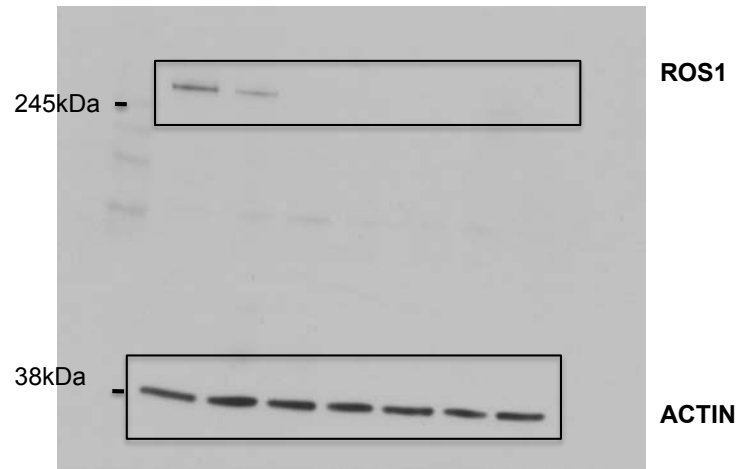

Uncropped western blots  
Fig. 2E

A

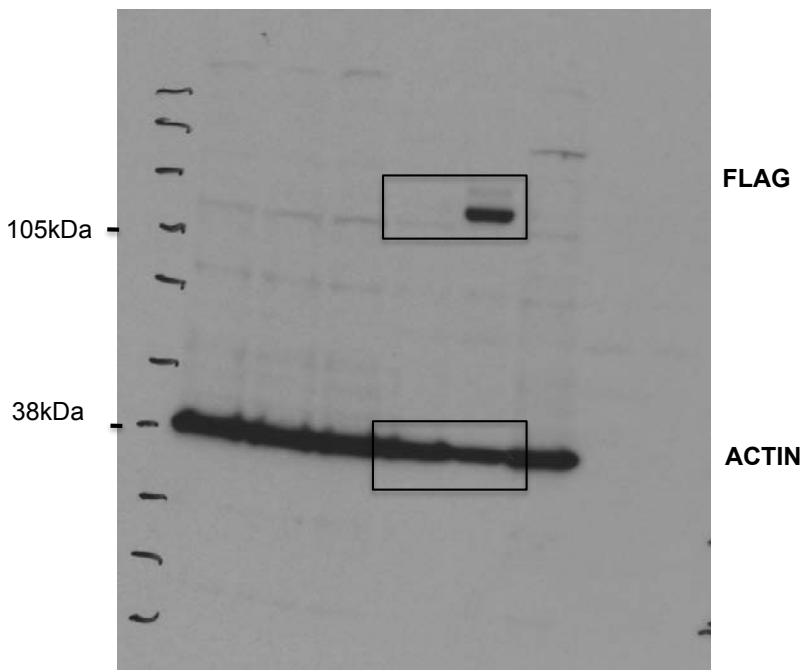

# Supplementary Figure 20

Uncropped western blots  
Fig. 3A

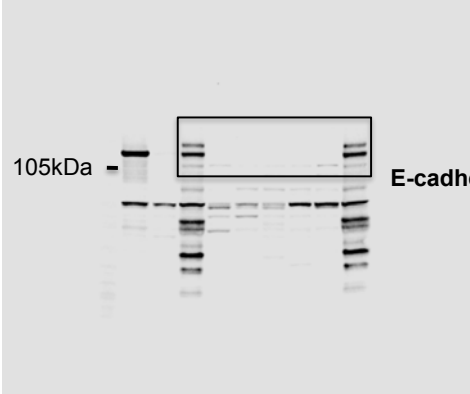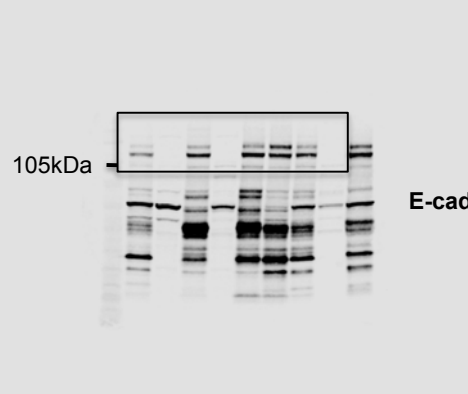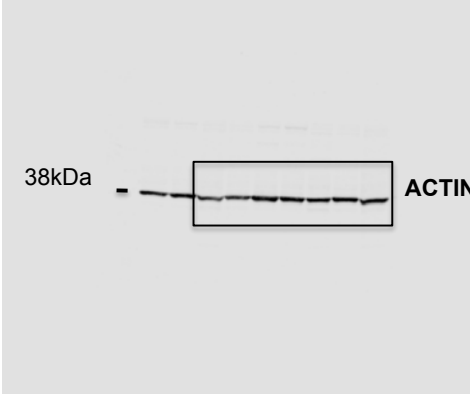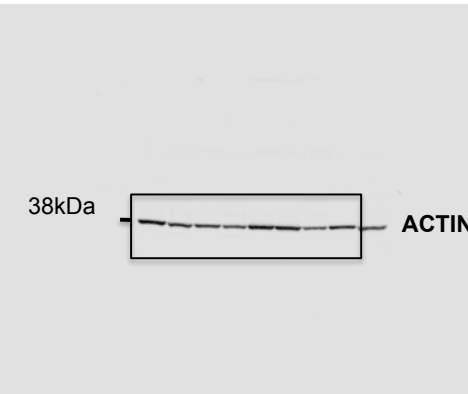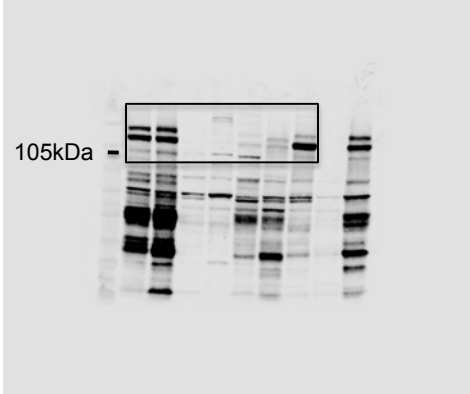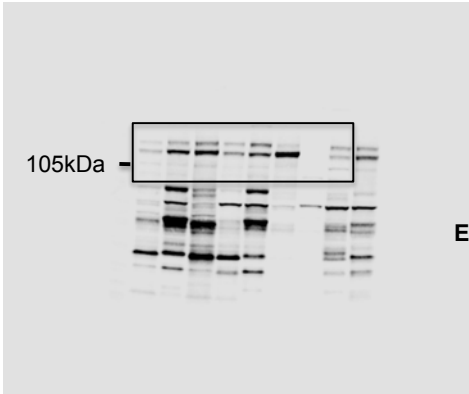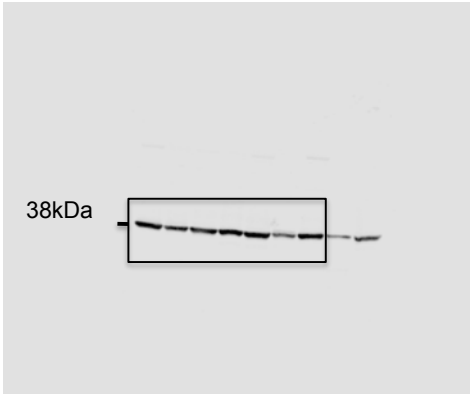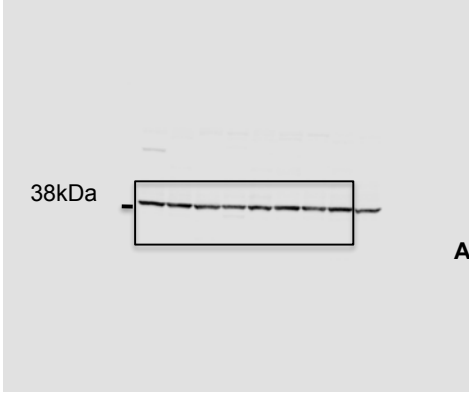

# Supplementary Figure 20

Uncropped western blots  
Fig. 3A

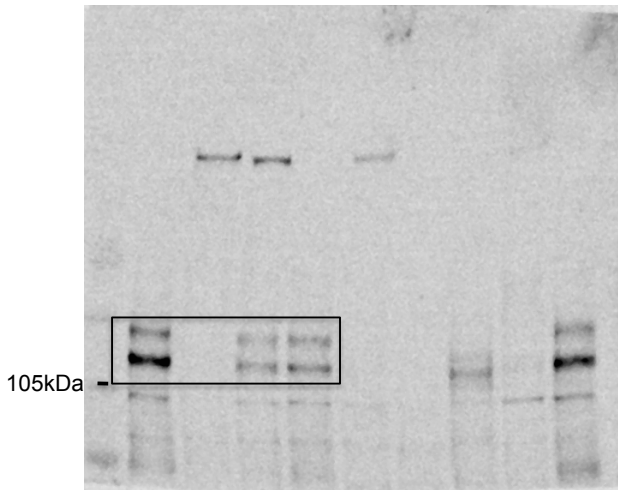

E-cadherin

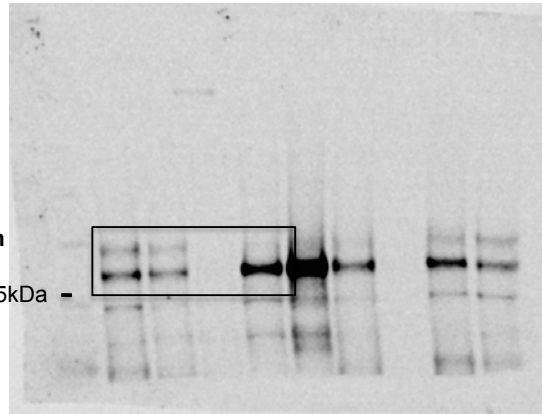

E-cadherin

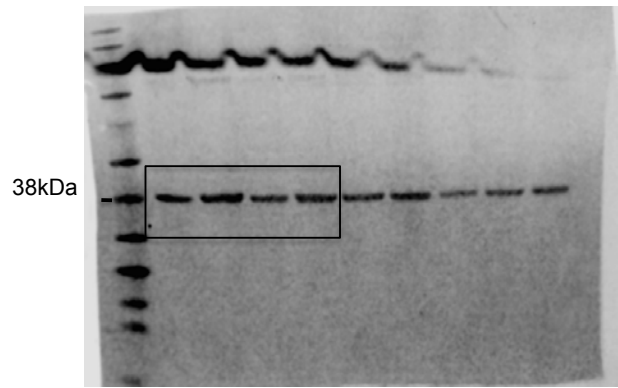

ACTIN

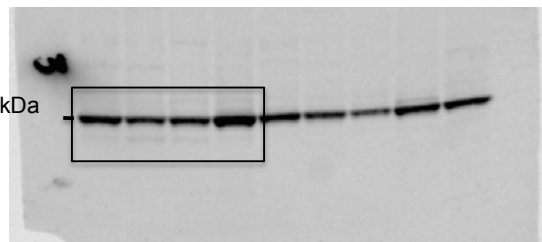

ACTIN

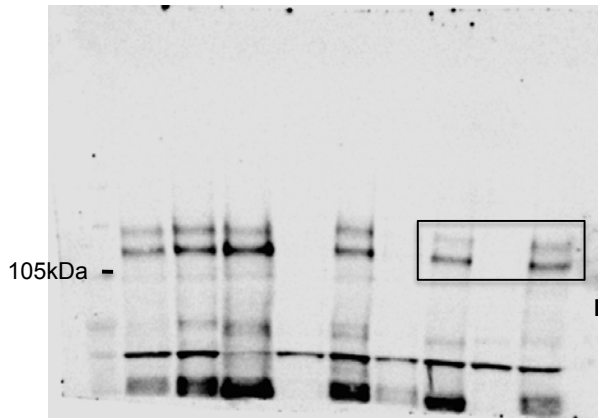

E-cadherin

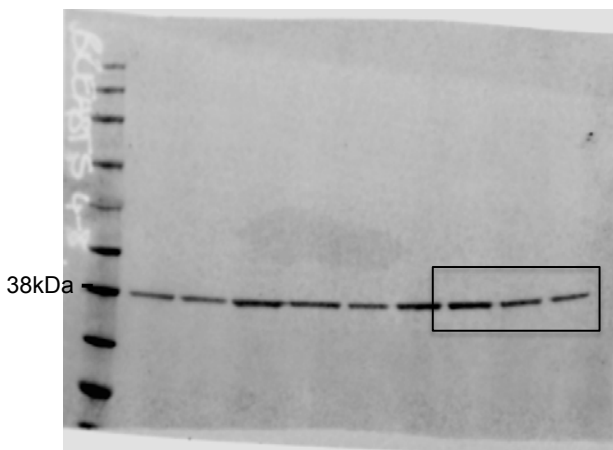

ACTIN

# Supplementary Figure 20

Uncropped western blots  
Fig. 5G

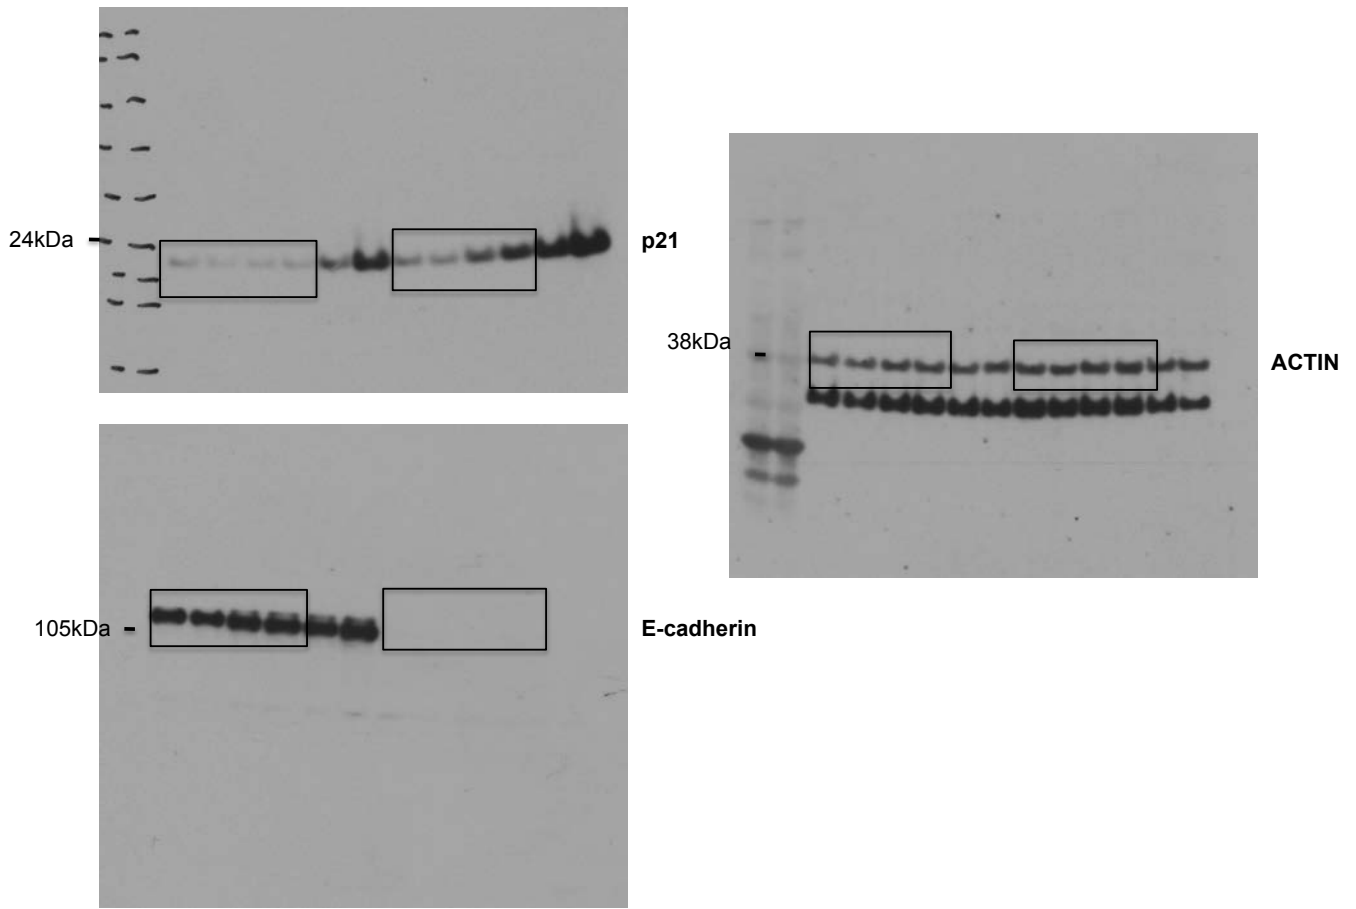

Uncropped western blots  
Fig. 6B

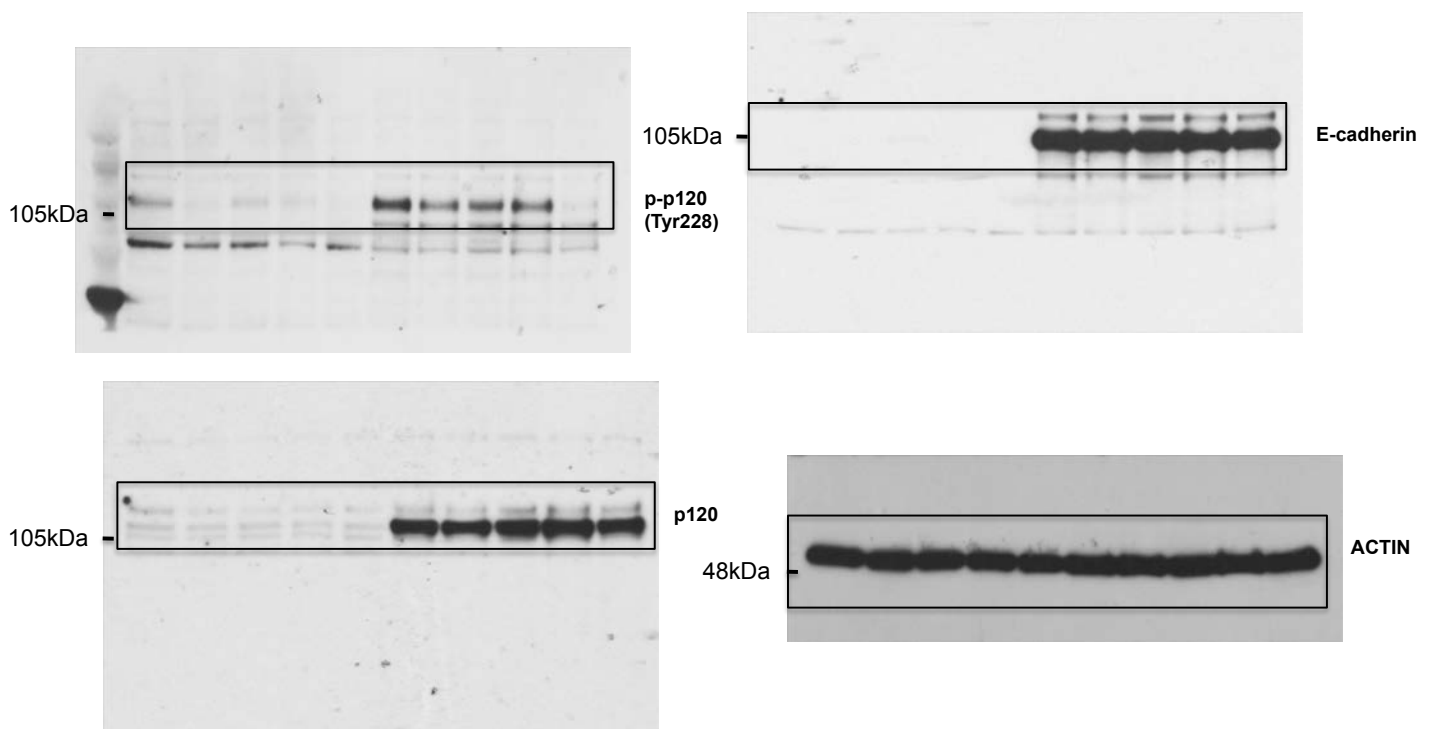

# Supplementary Figure 20

Uncropped western blots  
Fig. 6C

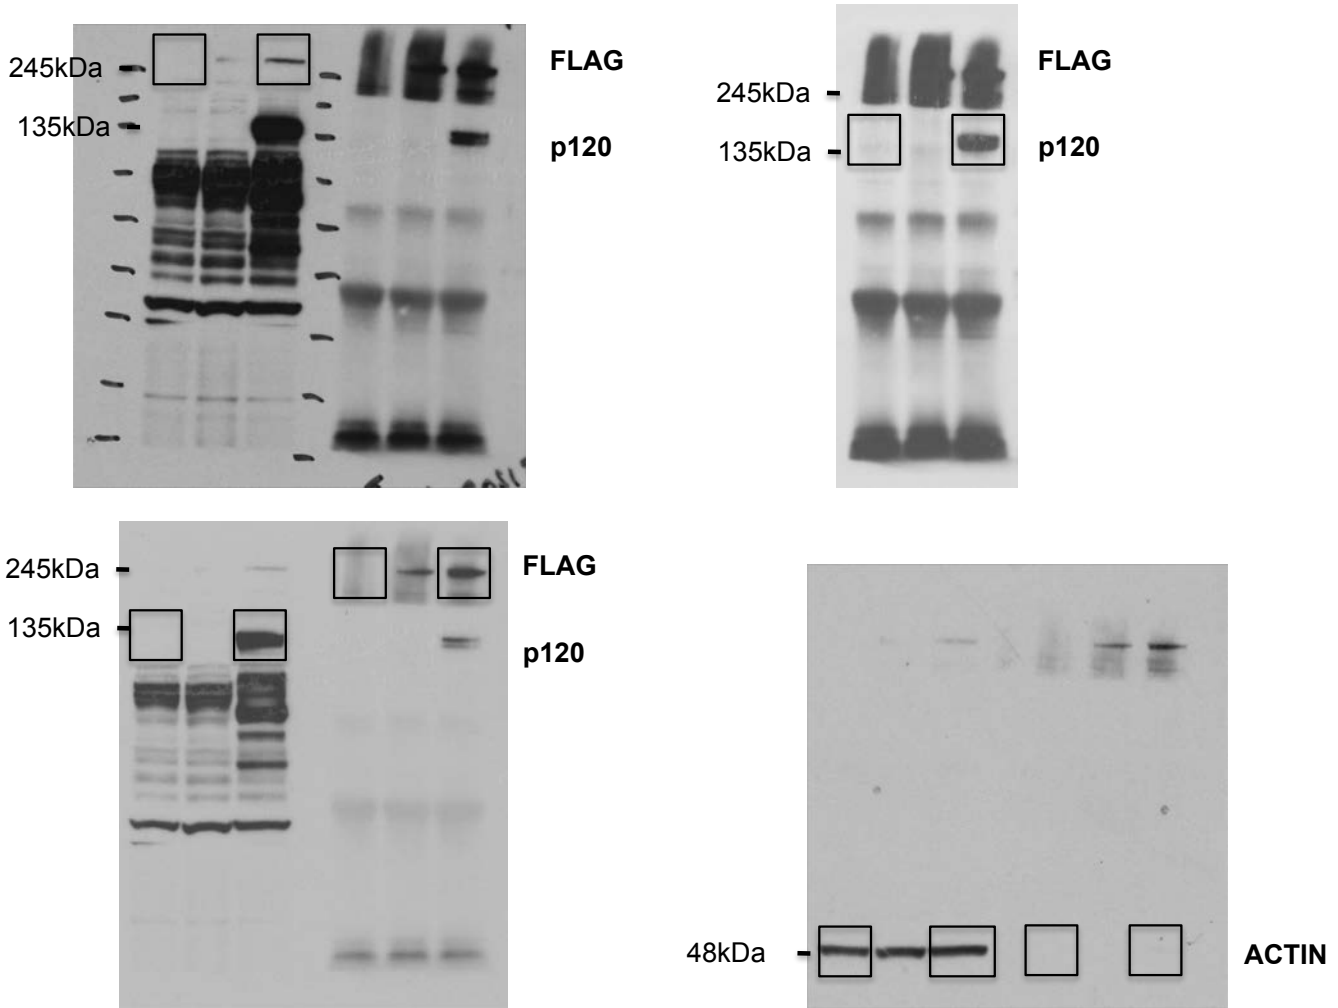

Uncropped western blots  
Fig. 6D

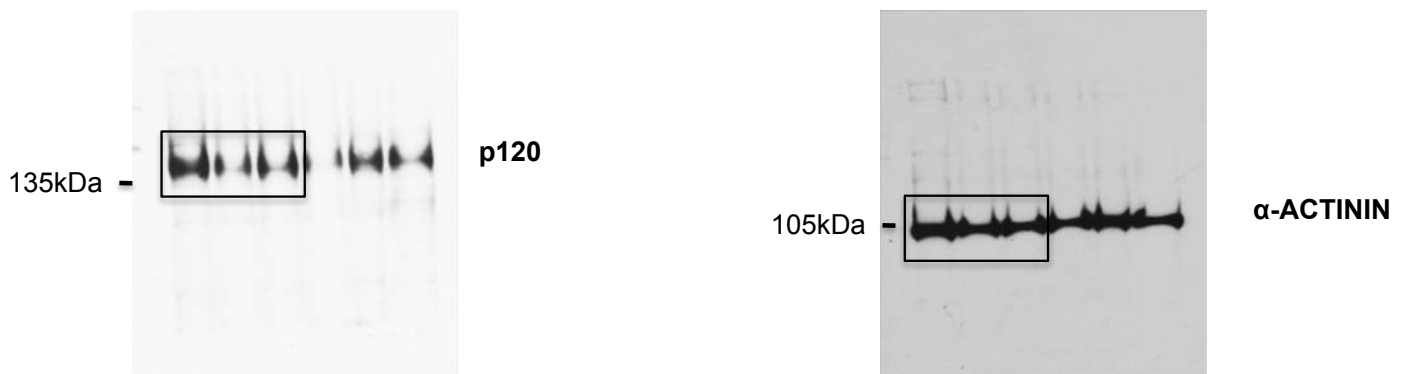

# Supplementary Figure 20

Uncropped western blots  
Supplementary Fig. S1

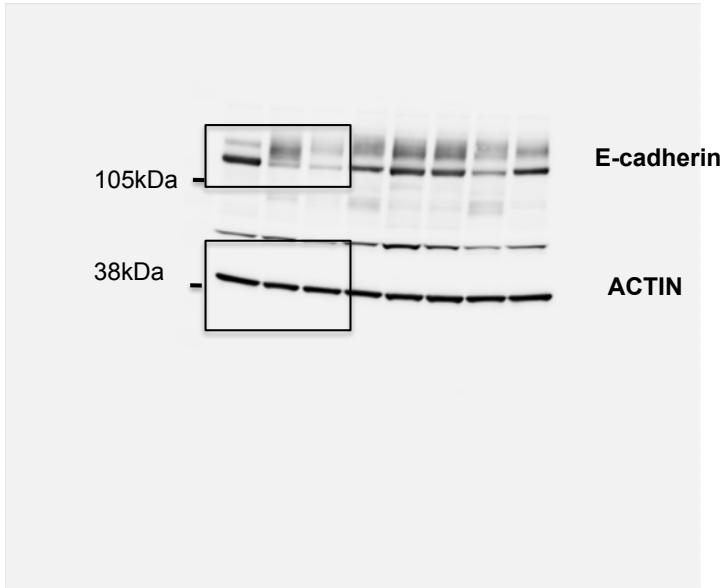

Uncropped western blots  
Supplementary Fig. S3

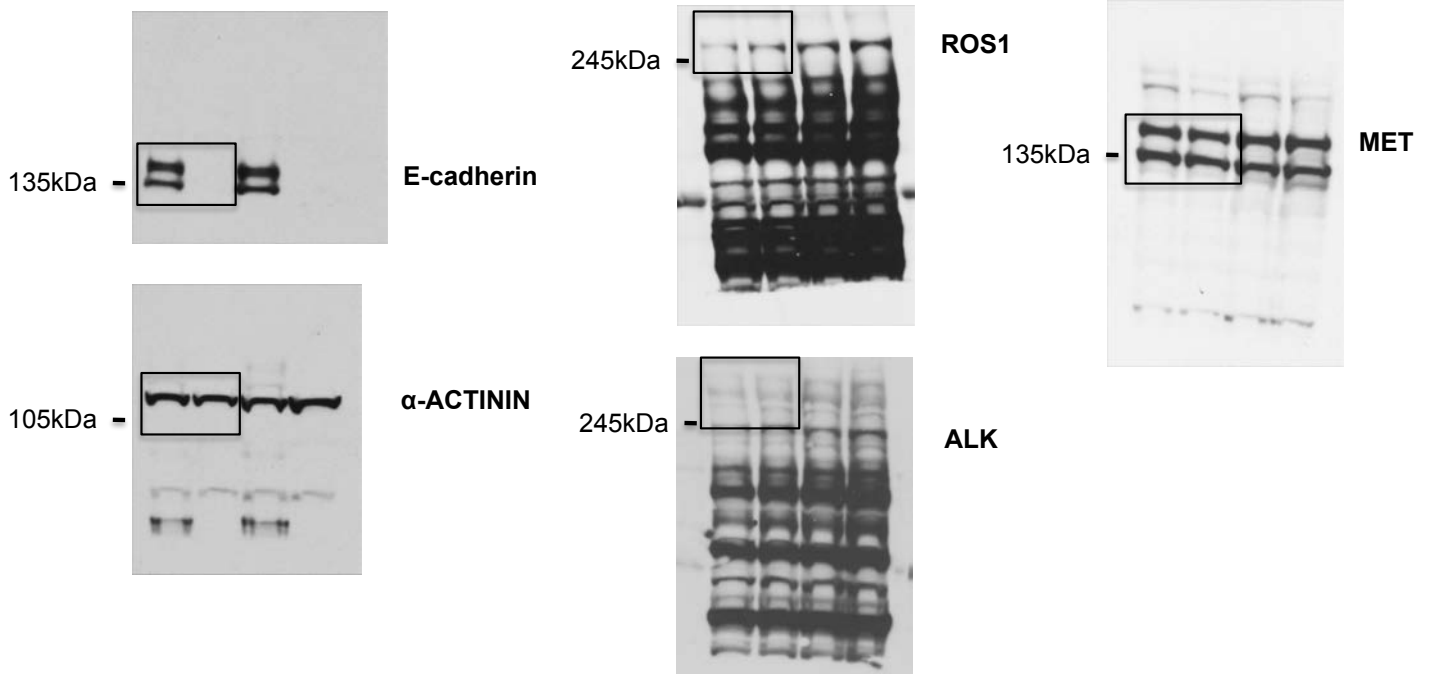

# Supplementary Figure 20

Uncropped western blots  
Supplementary Fig. S9A

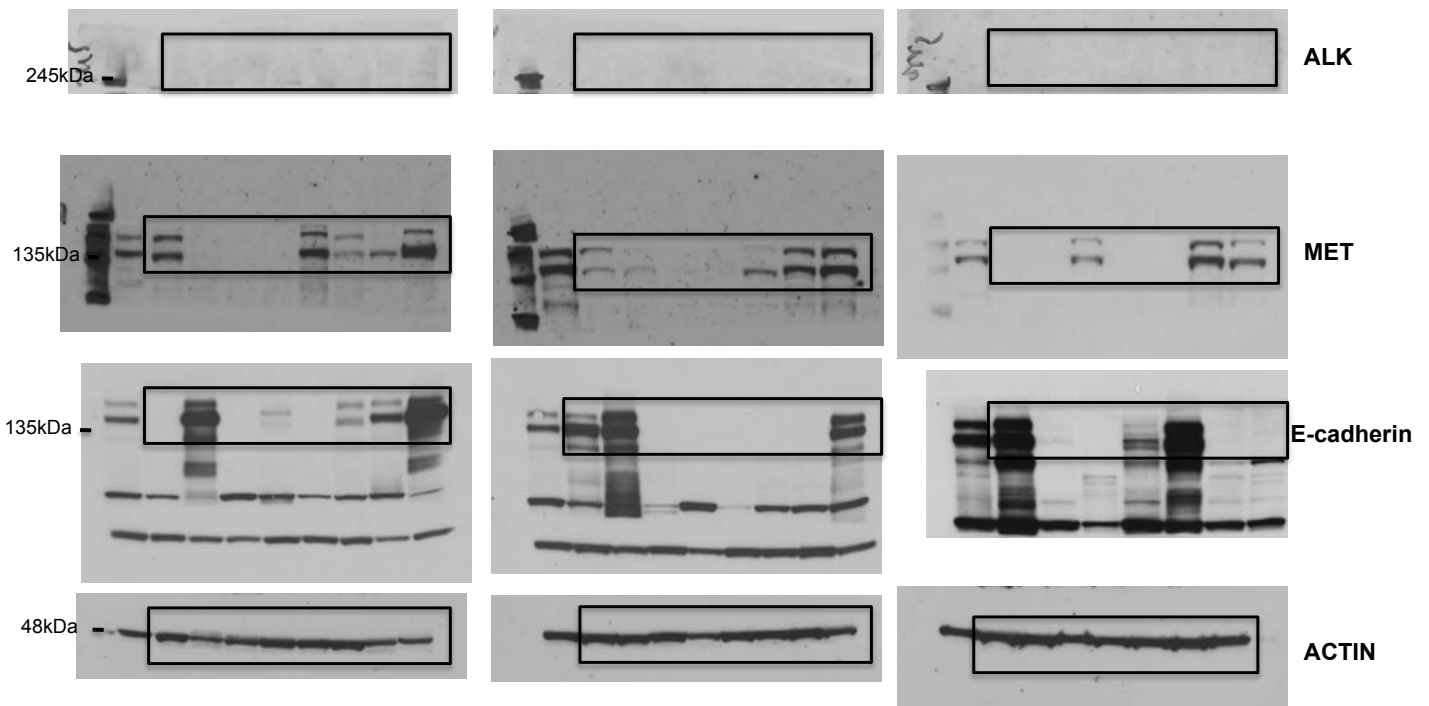

Uncropped western blots  
Supplementary Fig. S9A

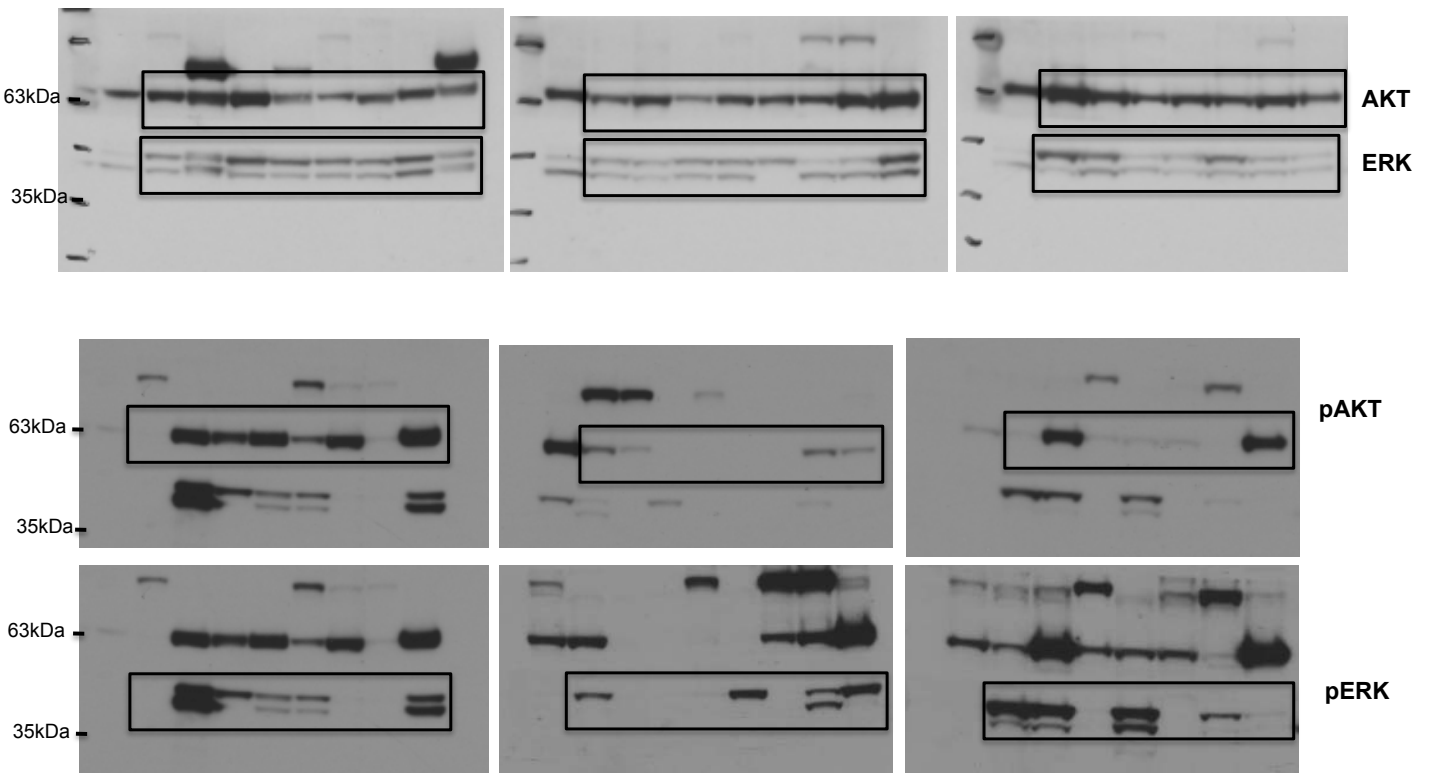

# Supplementary Figure 20

Uncropped western blots  
Supplementary Fig. S10A

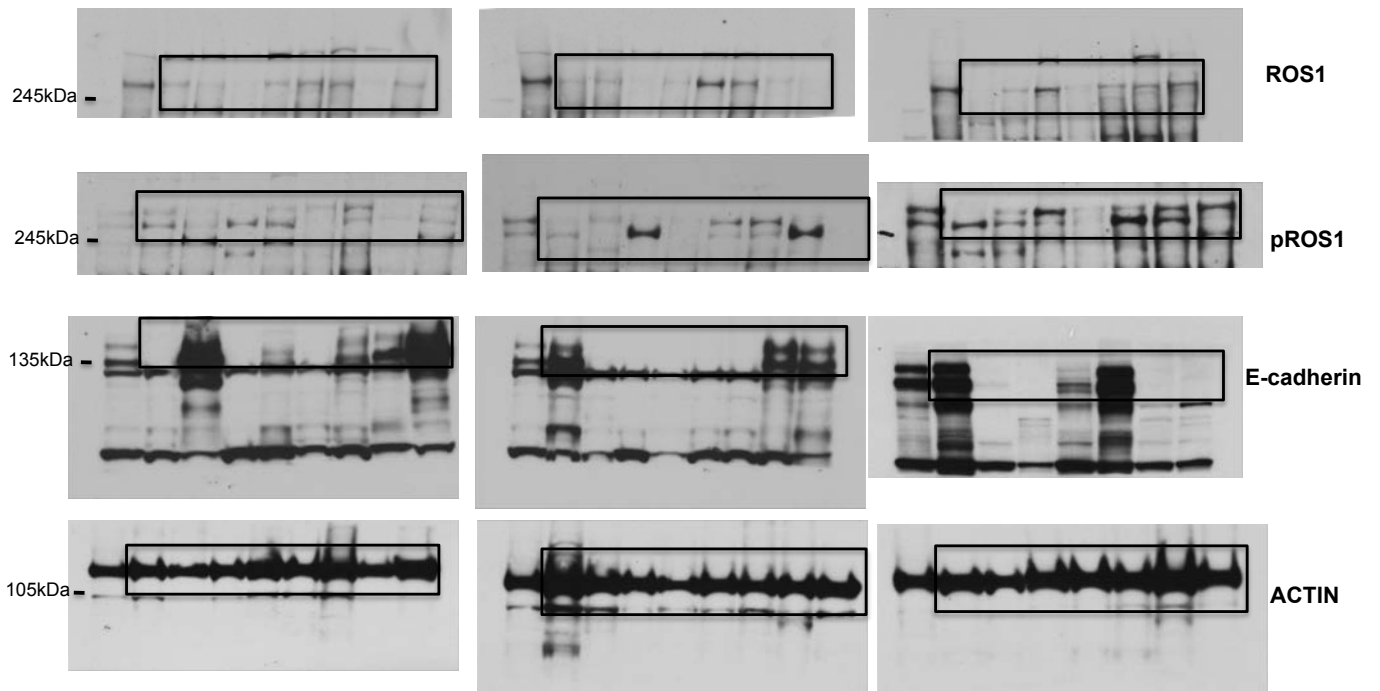

Uncropped western blots  
Supplementary Fig. S12A

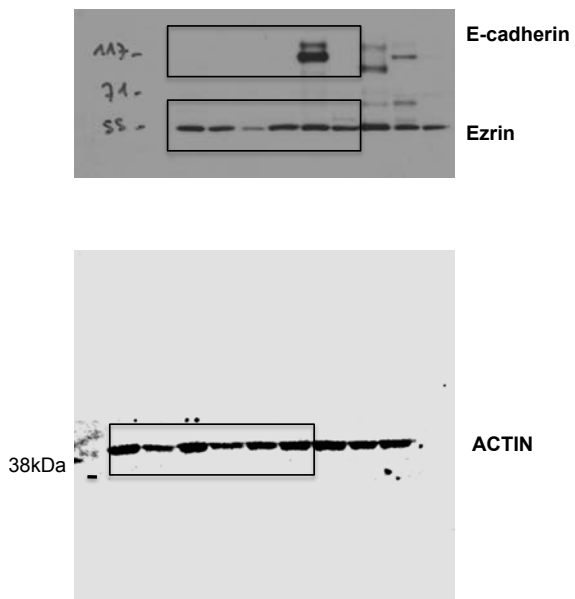

Uncropped western blots  
Supplementary Fig. S13

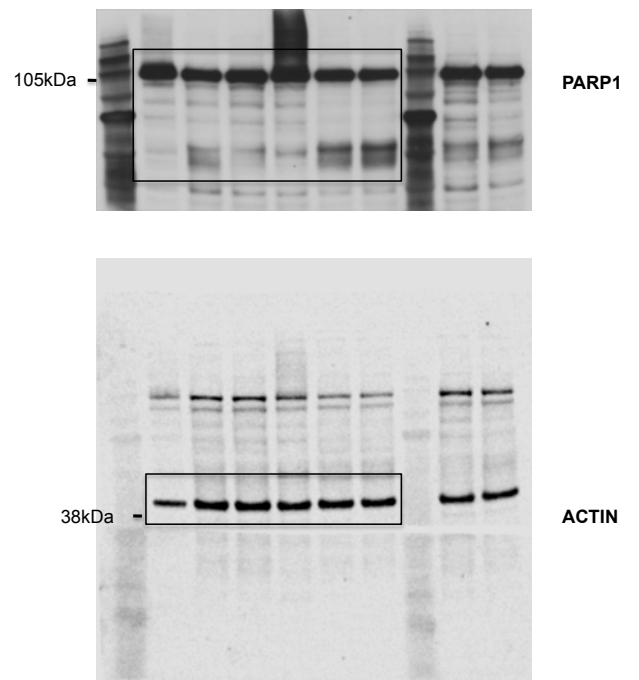



# Supplementary Figure 20

Uncropped western blots  
Supplementary Fig. S14D

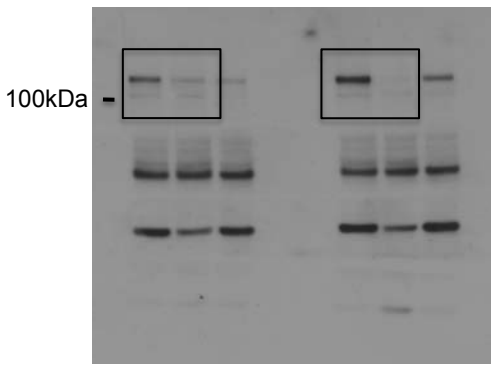

Low exposure  
p-p120 (Tyr228)

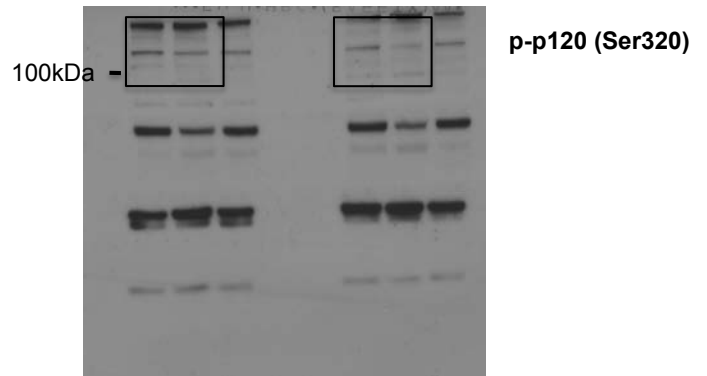

p-p120 (Ser320)

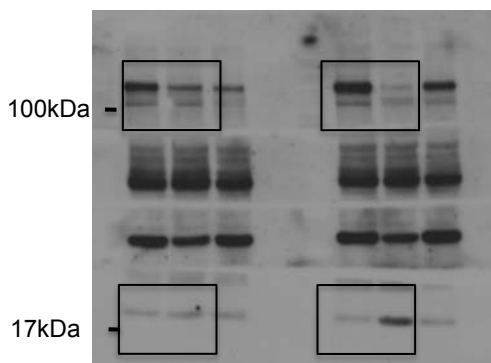

High exposure  
p-p120 (Tyr228)

γH2AX

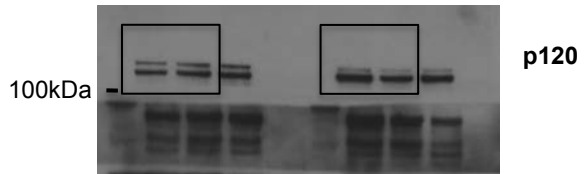

p120

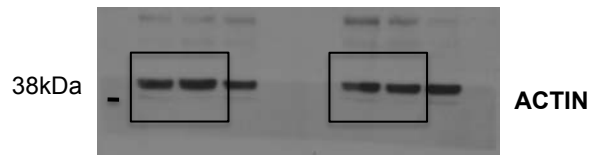

ACTIN

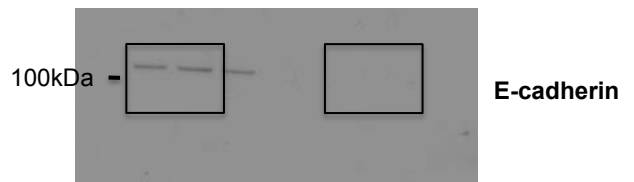

E-cadherin

Uncropped western blots  
Supplementary Fig. S15A

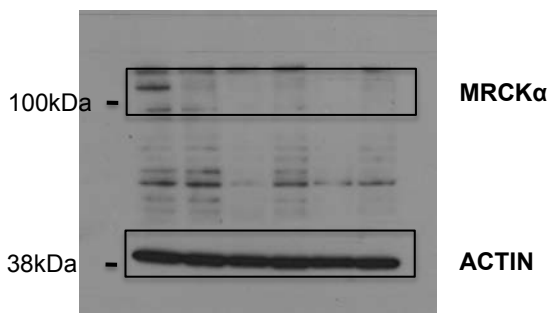

MRCKα

ACTIN
