# Supplementary material
Source: PubMed Central journal article supplement (PMC6296442)
Supplement: NIHMS80704-supplement-Suppl_Tables.pdf [file NIHMS80704-supplement-Suppl_Tables.pdf]

## Supplementary tables

### E-cadherin/ROS1 inhibitor synthetic lethality in breast cancer

Ilirjana Bajrami<sup>1,2</sup>, Rebecca Marlow<sup>3</sup>, Marieke van de Ven<sup>4</sup>, Rachel Brough<sup>1,2</sup>, Helen N. Pemberton<sup>1,2</sup>, Jessica Frankum<sup>1,2</sup>, Fei Fei Song<sup>1,2</sup>, Rumana Rafiq<sup>1,2</sup>, Asha Konde<sup>1,2</sup>, Dragomir B. Krastev<sup>1,2</sup>, Malini Menon<sup>1,2</sup>, James Campbell<sup>1,2</sup>, Aditi Gulati<sup>1,2</sup>, Rahul Kumar<sup>1,2</sup>, Stephen J. Pettitt<sup>1,2</sup>, Mark D. Gurden<sup>1</sup>, Marta Llorca Cardenosa<sup>1,5</sup>, Irene Chong<sup>1</sup>, Patrycja Gazinska<sup>3</sup>, Fredrik Wallberg<sup>6</sup>, Elinor J. Sawyer<sup>7</sup>, Lesley-Ann Martin<sup>1</sup>, Mitch Dowsett<sup>1</sup>, Spiros Linardopoulos<sup>1,8</sup>, Rachael Natrajan<sup>1</sup>, Colm J. Ryan<sup>9</sup>, Patrick W.B. Derksen<sup>10</sup>, Jos Jonkers<sup>11</sup>, Andrew N.J. Tutt<sup>1,3</sup>, Alan Ashworth<sup>12\*</sup>, Christopher J. Lord<sup>1,2\*</sup>

**Supplementary Table S1 Small molecule inhibitor profiling in CRISPR-Cas9 generated E-cadherin defective MCF7 model.** Median surviving fraction, median ratio and *p* value for MCF7 A02 and MCF7 Parental cells are shown.

| Small molecule inhibitor ID                     | Median surviving fraction in MCF7 Parental | Median surviving fraction in MCF7 A02 | Median MCF7 A02/Median MCF7 Parental ratio | <i>p</i> value |
|-------------------------------------------------|--------------------------------------------|---------------------------------------|--------------------------------------------|----------------|
| PF-02341066(MET/ALKi)(1000nM)                   | 0.659                                      | 0.256                                 | 0.389                                      | 0.0004         |
| PF-03758309(PAKi)(1000nM)                       | 0.34                                       | 0.136                                 | 0.399                                      | 0.0001         |
| PF-03758309(PAKi)(100nM)                        | 0.472                                      | 0.189                                 | 0.4                                        | 4.0278E-05     |
| PF-03758309(PAKi)(50nM)                         | 0.393                                      | 0.168                                 | 0.428                                      | 2.5432E-05     |
| PF-03758309(PAKi)(5nM)                          | 0.518                                      | 0.226                                 | 0.436                                      | 0.0002032      |
| BEZ-235(PI3K/mTORi)(500nM)                      | 0.333                                      | 0.15                                  | 0.449                                      | 0.0011         |
| BI-2536(PLKi)(100nM)                            | 0.294                                      | 0.134                                 | 0.457                                      | 0.0071         |
| PF-03814735(Aurora)(100nM)                      | 1.078                                      | 0.498                                 | 0.462                                      | 0.0002         |
| gemcitabine.HCl(DNArepinhib)(50nM)              | 0.287                                      | 0.134                                 | 0.467                                      | 9.5427E-06     |
| PF-02341066(MET/ALKi)(500nM)                    | 0.789                                      | 0.372                                 | 0.472                                      | 0.0002         |
| gemcitabine.HCl(DNArepinhib)(500nM)             | 0.272                                      | 0.129                                 | 0.473                                      | 0.0022         |
| crizotinib(ALKi)(500nM)                         | 0.769                                      | 0.379                                 | 0.493                                      | 0.0002         |
| crizotinib(ALKi)(1000nM)                        | 0.605                                      | 0.298                                 | 0.493                                      | 0.0032         |
| PF-03758309(PAKi)(10nM)                         | 0.687                                      | 0.341                                 | 0.496                                      | 0.0001         |
| paclitaxel(microtubulepoison)(1000nM)           | 0.26                                       | 0.129                                 | 0.496                                      | 0.0137         |
| Foretinib(METi,VEGFR2i,KDRi)(500nM)             | 0.781                                      | 0.39                                  | 0.499                                      | 0.0072         |
| gemcitabine.HCl(DNArepinhib)(100nM)             | 0.286                                      | 0.146                                 | 0.511                                      | 0.0002         |
| BEZ-235(PI3K/mTORi)(1000nM)                     | 0.28                                       | 0.143                                 | 0.512                                      | 0.0002         |
| Foretinib(METi,VEGFR2i,KDRi)(1000nM)            | 0.734                                      | 0.382                                 | 0.521                                      | 0.0001         |
| MLN-4924(NEDDi)(100nM)                          | 0.33                                       | 0.174                                 | 0.528                                      | 0.0003         |
| PF-03814735(Aurora)(1000nM)                     | 0.792                                      | 0.42                                  | 0.53                                       | 0.0006         |
| paclitaxel(microtubulepoison)(100nM)            | 0.334                                      | 0.179                                 | 0.536                                      | 0.0031         |
| sunitinib(VEGFR1-3i,PDGFRi,Kiti,CSF1Ri)(1000nM) | 0.558                                      | 0.313                                 | 0.56                                       | 0.0051         |
| YM155(Survivin-suppressant)(10nM)               | 0.376                                      | 0.211                                 | 0.561                                      | 0.0071         |
| paclitaxel(microtubulepoison)(10nM)             | 0.379                                      | 0.214                                 | 0.566                                      | 0.0008         |
| YM155(Survivin-suppressant)(5nM)                | 0.793                                      | 0.45                                  | 0.568                                      | 0.0008         |
| paclitaxel(microtubulepoison)(5nM)              | 0.449                                      | 0.256                                 | 0.57                                       | 0.0215         |
| (S)+camptothecin(TOPOIpoison)(50nM)             | 0.366                                      | 0.211                                 | 0.578                                      | 0.0003         |
| PLX-4720(BRAF <sub>i</sub> )(0.5nM)             | 1.057                                      | 0.611                                 | 0.578                                      | 0.0011         |
| BEZ-235(PI3K/mTORi)(100nM)                      | 1.085                                      | 0.629                                 | 0.579                                      | 0.0021         |
| paclitaxel(microtubulepoison)(50nM)             | 0.304                                      | 0.179                                 | 0.59                                       | 0.0028         |
| PF-04929113(HSP90i)(50nM)                       | 0.53                                       | 0.317                                 | 0.597                                      | 0.0041         |
| sunitinib(VEGFR1-3i,PDGFRi,Kiti,CSF1Ri)(10nM)   | 1.109                                      | 0.667                                 | 0.601                                      | 0.0011         |
| lestaurtinib(1mM)(JAK2/FLT3/TrkAi)(200nM)       | 0.873                                      | 0.527                                 | 0.604                                      | 0.0069         |
| (S)+camptothecin(TOPOIpoison)(100nM)            | 0.284                                      | 0.172                                 | 0.606                                      | 0.0009         |
| sapacitabine(CNDAC)(1000nM)                     | 0.647                                      | 0.401                                 | 0.619                                      | 0.0035         |
| etoposide(TOPOIi)(1000nM)                       | 0.524                                      | 0.335                                 | 0.638                                      | 0.0016         |
| BMN-673(PARPi)(100nM)                           | 0.713                                      | 0.456                                 | 0.64                                       | 0.0014         |
| PF-04929113(HSP90i)(100nM)                      | 0.261                                      | 0.168                                 | 0.641                                      | 0.0126         |
| BMN-673(PARPi)(500nM)                           | 0.626                                      | 0.404                                 | 0.645                                      | 0.0009         |
| PF-03814735(Aurora)(500nM)                      | 0.989                                      | 0.641                                 | 0.648                                      | 0.0001         |
| MLN-4924(NEDDi)(50nM)                           | 0.418                                      | 0.272                                 | 0.65                                       | 0.0022         |
| Sapacitabine(CNDAC)(500nM)                      | 0.762                                      | 0.499                                 | 0.656                                      | 0.0043         |
| DMX_2320(IKKeinhibitor)(1000nM)                 | 0.975                                      | 0.641                                 | 0.657                                      | 0.0196         |
| sapacitabine(CNDAC)(10nM)                       | 0.887                                      | 0.586                                 | 0.661                                      | 0.0278         |
| etoposide(TOPOIi)(500nM)                        | 0.576                                      | 0.382                                 | 0.663                                      | 0.0006         |
| (S)+camptothecin(TOPOIpoison)(0.5nM)            | 0.836                                      | 0.562                                 | 0.672                                      | 0.0421         |
| BMN-673(PARPi)(1000nM)                          | 0.62                                       | 0.421                                 | 0.679                                      | 0.002          |
| gemcitabine.HCl(DNArepinhib)(10nM)              | 0.292                                      | 0.206                                 | 0.708                                      | 0.0232         |
| 5-FU(anti-metabolite)(1000nM)                   | 0.894                                      | 0.634                                 | 0.709                                      | 0.0024         |
| doxorubicin.HCl(DNAintercalator)(50nM)          | 0.351                                      | 0.25                                  | 0.712                                      | 0.001          |
| BMN-673(PARPi)(50nM)                            | 0.703                                      | 0.502                                 | 0.714                                      | 0.0037         |
| methotrexate(10nM)                              | 1.107                                      | 0.818                                 | 0.739                                      | 0.0034         |
| (S)+camptothecin(TOPOIpoison)(10nM)             | 0.603                                      | 0.446                                 | 0.74                                       | 0.0103         |
| 17-AAG(HSP90i)(50nM)                            | 0.364                                      | 0.272                                 | 0.749                                      | 0.0068         |

**Supplementary Table S2 Summary table of drug screen AUC, AUC ratios and *p* values for MCF7 A02 and MCF7 Parental isogenic cells**

| <b>Small molecule inhibitor ID</b>  | <b>MCF7 A02<br/>median AUC</b> | <b>MCF7<br/>Parental<br/>median AUC</b> | <b>MCF7 A02<br/>AUC/MCF7<br/>Parental AUC ratio</b> | <b><i>p</i> value</b> |
|-------------------------------------|--------------------------------|-----------------------------------------|-----------------------------------------------------|-----------------------|
| PF-03758309(PAKi)                   | 135.3                          | 311.4                                   | 0.43                                                | 0.0000056             |
| gemcitabine.HCl(DNArepinhib)        | 146.3                          | 273.9                                   | 0.53                                                | 0.0000535             |
| paclitaxel(microtubulepoison)       | 154.5                          | 266.4                                   | 0.58                                                | 0.0012748             |
| BEZ-235(PI3K/mTORi)                 | 327.3                          | 551.9                                   | 0.59                                                | 0.0006430             |
| PF-03814735(Aurora)                 | 577.6                          | 961.8                                   | 0.60                                                | 0.0000959             |
| MLN-4924(NEDDi)                     | 156.4                          | 238.9                                   | 0.65                                                | 0.0026734             |
| BMN-673(PARPi)                      | 431.4                          | 656.6                                   | 0.66                                                | 0.0002943             |
| Camptothecin(TOPOIpoison)           | 83.83                          | 127.4                                   | 0.66                                                | 0.0000090             |
| Foretinib(METi,VEGFR2i,KDRi)        | 591                            | 879.5                                   | 0.67                                                | 0.0073153             |
| Everolimus(mTORi)                   | 911                            | 1353                                    | 0.67                                                | 0.0000939             |
| PF-04691502(PI3K/mTORi)             | 228.6                          | 336.7                                   | 0.68                                                | 0.0071079             |
| PF-02341066(MET/ALKi)               | 577.4                          | 831.6                                   | 0.69                                                | 0.0004426             |
| Crizotinib(ALKi)                    | 625.2                          | 879.1                                   | 0.71                                                | 0.0000970             |
| Flavopiridol(CDKi)                  | 149                            | 204.2                                   | 0.73                                                | 0.0194037             |
| Doxorubicin(DNAintercalator)        | 100.4                          | 136.9                                   | 0.73                                                | 0.0029741             |
| PF-04929113(HSP90i)                 | 146.1                          | 196                                     | 0.75                                                | 0.0013952             |
| 17-AAG(HSP90i)                      | 124.6                          | 167.1                                   | 0.75                                                | 0.0116781             |
| PF-332991(CDK4/6i)                  | 1070                           | 1430                                    | 0.75                                                | 0.0015142             |
| RO-3306(CDK1i)                      | 1027                           | 1279                                    | 0.80                                                | 0.0301231             |
| Sapacitabine(CNDAC)                 | 686.4                          | 842.9                                   | 0.81                                                | 0.0180510             |
| Etoposide(TOPOIi)                   | 702.7                          | 854                                     | 0.82                                                | 0.0018328             |
| MK2206(AKTi)                        | 1131                           | 1349                                    | 0.84                                                | 0.0118299             |
| YM155(Survivin-suppressant)         | 31.61                          | 37.58                                   | 0.84                                                | 0.0042925             |
| GSK2194069A(FASi)                   | 2113                           | 2505                                    | 0.84                                                | 0.0210857             |
| Methotrexate                        | 676.6                          | 767.1                                   | 0.88                                                | 0.0180580             |
| Sorafenib(inhibitsRAF,PDGF,VEGF1&2) | 1114                           | 1026                                    | 1.09                                                | 0.0492614             |
| Salinomycin(microtubulepoison)      | 1305                           | 730.3                                   | 1.79                                                | 0.0001269             |

**Supplementary Table S3 RNAi screen in CRISPR-Cas9 generated E-cadherin defective model.** The difference in Z-score data of median of E-cadherin defective and median of wt. groups are shown.

| GeneID   | Median Z score Parental | Median Z score A02 | Difference in Z score | Students t-test |
|----------|-------------------------|--------------------|-----------------------|-----------------|
| PMS1     | -0.37868745             | -8.98291435        | -8.6042269            | 0.000157058     |
| KIT      | -0.51398672             | -8.83138319        | -8.31739647           | 3.23471E-06     |
| CHIC2    | -0.24934777             | -7.56700148        | -7.31765371           | 0.000491343     |
| FBXO11   | -0.47643587             | -7.75906429        | -7.28262842           | 5.75639E-05     |
| PRKAR2B  | -0.22223177             | -7.3524416         | -7.13020984           | 0.00377432      |
| DCLRE1A  | -1.15851394             | -7.98333021        | -6.82481627           | 0.000612272     |
| KMT2C    | -1.15948954             | -7.97654051        | -6.81705097           | 1.74845E-05     |
| CSNK1A1  | -1.24075613             | -7.72050314        | -6.47974701           | 0.000216709     |
| H3F3A    | 1.227762649             | -5.0679676         | -6.29573025           | 0.005129908     |
| INSRR    | -1.48048109             | -7.77183138        | -6.29135029           | 0.00020486      |
| PIM1     | 0.384101613             | -5.87138389        | -6.25548551           | 0.000381328     |
| FLJ21816 | -1.43658773             | -7.64235611        | -6.20576838           | 0.000201037     |
| EBF1     | 0.776518801             | -5.34505678        | -6.12157558           | 0.015351369     |
| UBR5     | -1.28318069             | -7.35090876        | -6.06772807           | 9.81113E-05     |
| CRK7     | -0.48822231             | -6.35016686        | -5.86194455           | 0.001680351     |
| CCDC6    | -1.42492956             | -7.06507291        | -5.64014335           | 0.000156725     |
| HUNK     | -1.4630816              | -7.04536056        | -5.58227896           | 0.000488868     |
| DGUOK    | 0.650828892             | -4.85190435        | -5.50273324           | 0.000314777     |
| CDC2     | -0.72278912             | -6.21507314        | -5.49228402           | 0.00022434      |
| ATRIP    | 0.362360903             | -5.12057518        | -5.48293608           | 0.000538097     |
| WRN      | -0.98830613             | -6.47105232        | -5.4827462            | 0.001924952     |
| CTNNB1   | -0.63465189             | -6.03550606        | -5.40085417           | 0.005050959     |
| KMT2D    | -1.33572548             | -6.72874917        | -5.39302369           | 0.000396323     |
| RUNX1    | -0.82421605             | -6.1880993         | -5.36388325           | 0.000805091     |
| AAK1     | -0.33184708             | -5.69220545        | -5.36035836           | 0.000973975     |
| PRKCN    | 0.570660407             | -4.75171683        | -5.32237724           | 0.009811467     |
| GATA1    | -0.98775391             | -6.28738778        | -5.29963387           | 0.001862397     |
| SBK1     | -0.73078421             | -5.9563222         | -5.22553799           | 0.001572046     |
| MAP2K7   | -0.8058538              | -5.97229345        | -5.16643965           | 0.000376876     |
| PFKFB4   | -0.54289259             | -5.57442057        | -5.03152797           | 0.020316338     |
| ARID1A   | -0.60278036             | -5.58206205        | -4.97928169           | 0.005199919     |
| MSH3     | -0.76262113             | -5.67603399        | -4.91341286           | 0.001794646     |
| TRIM24   | -0.47812214             | -5.38892315        | -4.910801             | 0.000382544     |
| STK38L   | -0.67035213             | -5.49776299        | -4.82741086           | 0.004361046     |
| DDX5     | -1.35122612             | -6.12012632        | -4.7689002            | 0.000141545     |
| PRDM16   | 0.78940912              | -3.97140585        | -4.76081497           | 0.019166968     |
| RP86KA2  | -1.25391289             | -5.98601505        | -4.73210216           | 0.000796379     |
| TGFBFR1  | 0.409488382             | -4.30637608        | -4.71586447           | 0.011352904     |
| EPHA4    | -0.9245529              | -5.60847235        | -4.68391945           | 0.002335804     |
| RPA3     | -1.38333275             | -6.04486487        | -4.66153212           | 8.77224E-05     |
| TRIP11   | 0.005157012             | -4.63756233        | -4.64271934           | 0.024706798     |
| PFKP     | -0.67442115             | -5.21603922        | -4.54161807           | 0.045371638     |
| ADP-GK   | -0.97323477             | -5.48985303        | -4.51661827           | 0.001854579     |
| POT1     | -1.36896822             | -5.88109006        | -4.51212183           | 0.000146199     |
| NEK4     | -0.08598567             | -4.57934673        | -4.49336106           | 0.033345167     |
| GTF2H4   | -0.27520057             | -4.72076013        | -4.44555957           | 0.002583076     |
| ADCK4    | 0.333301162             | -4.03184327        | -4.36514444           | 0.017771881     |
| GTF2H1   | -0.6274943              | -4.90083955        | -4.27334525           | 0.011279748     |
| PLK1     | -1.01026031             | -5.20775162        | -4.19749131           | 0.001593987     |
| PTEN     | 0.42616659              | -3.70382457        | -4.12999116           | 0.001203126     |
| AK5      | -1.173301               | -5.28589924        | -4.11259824           | 0.010069824     |
| ATF1     | 0.083926536             | -4.00854044        | -4.09246697           | 0.000411106     |
| ZBTB16   | 0.215516313             | -3.82420709        | -4.03972341           | 0.015400172     |
| GRK4     | -1.34929841             | -5.35582664        | -4.00652822           | 0.000498204     |
| PLK3     | -1.29844066             | -5.25143729        | -3.95299664           | 0.004324462     |
| FYN      | -1.31220116             | -5.2442765         | -3.93207534           | 0.002023798     |
| ROS1     | -0.49442849             | -4.34423518        | -3.84980669           | 0.030213832     |
| POLM     | -0.44870629             | -4.29010774        | -3.84140145           | 0.000297354     |
| FANCI    | -0.8100982              | -4.63999479        | -3.82989659           | 0.053240715     |
| DAXX     | 0.821090414             | -2.99236049        | -3.8134509            | 0.000897737     |
| PRKAG3   | -1.360728               | -5.1598619         | -3.7991339            | 0.000970212     |
| FEV      | -1.17576063             | -4.96998464        | -3.79422401           | 0.00116181      |
| SSX2     | -1.02529557             | -4.81330784        | -3.78801227           | 0.007729931     |
| CLK3     | -0.58729081             | -4.34366846        | -3.75637765           | 0.009591982     |
| PRKCB1   | -1.50048056             | -5.25292696        | -3.7524464            | 0.000158787     |
| FES      | -0.39210366             | -4.1442883         | -3.75218464           | 0.008493374     |
| MSH4     | -0.30542159             | -4.04339584        | -3.73797426           | 0.013932418     |

  

| GeneID   | Median Z score Parental | Median Z score A02 | Difference in Z score | Students t-test |
|----------|-------------------------|--------------------|-----------------------|-----------------|
| NPM1     | -1.11536265             | -4.70782033        | -3.59245769           | 0.045643175     |
| PDCD1LG2 | -1.42689663             | -5.00114015        | -3.57424351           | 0.012844291     |
| FLAG1    | -1.36229198             | -4.88575082        | -3.52345884           | 0.00019456      |
| FANCG    | -0.52069173             | -4.00109819        | -3.48040646           | 0.000432207     |
| HOXC11   | 1.125960451             | -2.28970679        | -3.41566725           | 0.000106356     |
| DDIT3    | -1.04256821             | -4.32625127        | -3.28368306           | 0.017071472     |
| CDK12    | -0.1036177              | -3.37288538        | -3.26926767           | 0.038503948     |
| FANCB    | -0.38206882             | -3.61986303        | -3.23779421           | 0.040548552     |
| MERTK    | -0.81953587             | -2.87690355        | -3.05736768           | 0.01453234      |
| RECQL    | -0.41383062             | -3.42166959        | -3.00783897           | 0.005132054     |
| CREB3L2  | -1.13816631             | -4.1443255         | -3.00615918           | 0.002602646     |
| KDM6A    | -0.63013955             | -3.63298606        | -3.00284651           | 0.002069589     |
| CLTC     | -1.30341603             | -4.22631583        | -2.92289979           | 0.000861809     |
| NUTM1    | 0.424446202             | -2.27999367        | -2.70443987           | 0.011105984     |
| GALK1    | -0.46920544             | -3.14914839        | -2.67994295           | 0.004391752     |
| CDC2L1   | -0.87741537             | -3.52404619        | -2.64663082           | 0.002308364     |
| CPNE3    | -0.50139866             | -3.10907394        | -2.60767528           | 0.044875919     |
| CRTC3    | 0.362399679             | -2.15444816        | -2.51688384           | 0.009290478     |
| MITF     | 0.34934652              | -2.13805273        | -2.48739925           | 0.008902537     |
| TREX2    | -1.23565199             | -3.67032532        | -2.43467332           | 0.004135544     |
| SMARCE1  | -0.40796467             | -2.82778089        | -2.41981622           | 0.043945748     |
| PAK4     | -1.50379621             | -3.89188488        | -2.38808866           | 0.004456848     |
| POLH     | -1.07087282             | -3.39267782        | -2.32180499           | 1.08771E-05     |
| MYLK2    | -0.95124097             | -3.26527182        | -2.31403085           | 8.27814E-05     |
| C10ORF89 | -1.14154789             | -3.41840933        | -2.27686144           | 0.034933398     |
| SETD2    | -1.08157534             | -3.35432983        | -2.27275449           | 0.000327971     |
| LMTK3    | -1.25882889             | -3.5221478         | -2.26331891           | 0.000174692     |
| DCK      | -0.87783821             | -3.14074738        | -2.26290917           | 0.005743764     |
| FLT4     | 0.113209615             | -2.1488326         | -2.26204222           | 0.049605366     |
| C8orf19  | -1.25867281             | -3.49019105        | -2.23151824           | 0.026100848     |
| PCNA     | -0.96920804             | -3.16452046        | -2.20531242           | 0.023688738     |
| USP6     | -0.59633921             | -2.76106527        | -2.16472607           | 0.019816483     |
| PNUTL1   | -0.90801383             | -3.06208253        | -2.15406687           | 0.048633502     |
| TOPBP1   | -1.44774262             | -3.5871968         | -2.13945418           | 0.008390008     |
| ARAF1    | 0.047569234             | -2.0269218         | -2.07449103           | 0.036405259     |
| MN1      | -0.41296756             | -2.4427168         | -2.02974923           | 0.001726923     |
| PIK3C2A  | -1.46227691             | -3.48384269        | -2.02156578           | 0.00665146      |

**Supplementary Table S4** Gene ontology analysis of a list of 104 genes identified as E-cadherin synthetic lethal targets using EnrichR analysis.

| Name                                                            | P-value  | Adjusted p-value | Z-score | Combined score | Genes involved                                                                                                |
|-----------------------------------------------------------------|----------|------------------|---------|----------------|---------------------------------------------------------------------------------------------------------------|
| RNA polymerase II carboxy-terminal domain kinase activity       | 3.48E-13 | 1.60E-10         | -3.19   | 91.47          | PLK3, AAK1, HUNK, CSNK1A1, NEK4, PAK4, CPNE3, PIM1, CLK3, RPS6KA2, SBK1, STK38L, TGFB1, GTF2H1, GTF2H4, CDK12 |
| protein serine/threonine kinase activity                        | 5.29E-13 | 1.60E-10         | -3.21   | 90.66          | PLK3, AAK1, HUNK, CSNK1A1, NEK4, PAK4, CPNE3, PIM1, CLK3, RPS6KA2, SBK1, STK38L, GTF2H1, GTF2H4, CDK12, EPHA4 |
| myosin light chain kinase activity                              | 4.24E-11 | 8.52E-09         | -3.16   | 75.5           | PLK3, AAK1, HUNK, CSNK1A1, NEK4, PAK4, CPNE3, PIM1, CLK3, RPS6KA2, SBK1, STK38L, TGFB1, MYLK2                 |
| calmodulin-dependent protein kinase activity                    | 5.87E-11 | 8.85E-09         | -3.11   | 73.37          | PLK3, AAK1, HUNK, CSNK1A1, NEK4, PAK4, CPNE3, PIM1, CLK3, RPS6KA2, SBK1, STK38L, TGFB1, GTF2H1, GTF2H4, CDK12 |
| cyclin-dependent protein serine/threonine kinase activity       | 8.44E-11 | 1.02E-08         | -3.12   | 72.41          |                                                                                                               |
| cyclic nucleotide-dependent protein kinase activity             | 4.11E-10 | 1.35E-08         | -3.06   | 66.21          |                                                                                                               |
| transmembrane receptor protein serine/threonine kinase activity | 4.29E-10 | 1.35E-08         | -3.06   | 65.99          |                                                                                                               |
| GTP-dependent protein kinase activity                           | 4.11E-10 | 1.35E-08         | -3.05   | 65.96          | PLK3, AAK1, HUNK, CSNK1A1, NEK4, PAK4, CPNE3, PIM1, CLK3, RPS6KA2, SBK1, STK38L, TGFB1                        |
| Rho-dependent protein serine/threonine kinase activity          | 4.11E-10 | 1.35E-08         | -3.04   | 65.81          | PLK3, AAK1, HUNK, CSNK1A1, NEK4, PAK4, CPNE3, PIM1, CLK3, RPS6KA2, SBK1, STK38L, TGFB1                        |
| ribosomal protein S6 kinase activity                            | 4.11E-10 | 1.35E-08         | -3.04   | 65.72          |                                                                                                               |
| protein kinase C activity                                       | 4.49E-10 | 1.35E-08         | -3.05   | 65.71          |                                                                                                               |
| histone threonine kinase activity                               | 4.29E-10 | 1.35E-08         | -3.04   | 65.63          |                                                                                                               |
| 3-phosphoinositide-dependent protein kinase activity            | 4.11E-10 | 1.35E-08         | -3.04   | 65.62          |                                                                                                               |
| eukaryotic translation initiation factor 2alpha kinase activity | 4.29E-10 | 1.35E-08         | -3.04   | 65.59          |                                                                                                               |
| DNA-dependent protein kinase activity                           | 4.49E-10 | 1.35E-08         | -3.04   | 65.49          |                                                                                                               |
| G-protein coupled receptor kinase activity                      | 4.29E-10 | 1.35E-08         | -3.03   | 65.43          |                                                                                                               |
| histone serine kinase activity                                  | 4.69E-10 | 1.35E-08         | -3.05   | 65.42          |                                                                                                               |
| Fas-activated serine/threonine kinase activity                  | 4.11E-10 | 1.35E-08         | -3.03   | 65.4           |                                                                                                               |
| calcium-dependent protein serine/threonine kinase activity      | 4.29E-10 | 1.35E-08         | -3.03   | 65.39          |                                                                                                               |
| AMP-activated protein kinase activity                           | 4.69E-10 | 1.35E-08         | -3.04   | 65.37          |                                                                                                               |

**Supplementary Table S5** A summary of mutations, mRNA expression, copy number alterations and western blot analysis in a panel of 34 breast cell line models.

| Cell line ID | Histology | ccle protein mutations | ccle cDNA mutations              | ccle expression data | ccle CN data | COSMIC prot mut | COSMIC CDS mut | Sanger expression norm | sanger copy number | Western (1=defective, 0=wt) | Call used for analysis |
|--------------|-----------|------------------------|----------------------------------|----------------------|--------------|-----------------|----------------|------------------------|--------------------|-----------------------------|------------------------|
| BT20         | BREAST    | p.I451I                | AMP, c1353T>C                    | 10.70444             | 1.072        |                 |                | 1650.961               | 5                  | 0                           | 0                      |
| BT474        | BREAST    |                        |                                  | 10.77893             | 0.0683       |                 |                |                        |                    | 0                           | 0                      |
| CAMA1        | BREAST    | p.G571_splice          | c.1712_splice                    | 7.893037             | 0.1527       | p.?             | c.1712-1G>A    | 257                    | 2                  | 0                           | 0                      |
| DU4475       | BREAST    |                        |                                  | 7.708805             | 0.04         |                 |                | 376.9675               | 4                  | 0                           | 0                      |
| HCC1143      | BREAST    |                        |                                  | 9.936666             | -0.1906      |                 |                | 905                    | 3                  | 0                           | 0                      |
| HCC1954      | BREAST    |                        |                                  | 10.09732             | 0.4385       |                 |                | 1622.896               | 6                  | 0                           | 0                      |
| HCC202       | BREAST    |                        |                                  | 9.009011             | 0.1866       |                 |                |                        |                    | 0                           | 0                      |
| HCC38        | BREAST    |                        |                                  | 8.384195             | 0.0624       |                 |                | 1027.918               | 4                  | 0                           | 0                      |
| HCC70        | BREAST    |                        |                                  | 9.823594             | 0.603        |                 |                | 1284.946               | 6                  | 0                           | 0                      |
| HMT3552      | BREAST    |                        |                                  |                      |              |                 |                |                        |                    | 0                           | 0                      |
| JIMT1        | BREAST    |                        |                                  | 10.27569             | -0.2986      |                 |                |                        |                    | 0                           | 0                      |
| MCF12A       | BREAST    |                        |                                  |                      |              |                 |                |                        |                    | 0                           | 0                      |
| MCF7         | BREAST    |                        |                                  | 9.998439             | 0.0797       |                 |                | 1413.805               | 3                  | 0                           | 0                      |
| MDAMB468     | BREAST    |                        |                                  | 8.032266             | -0.3456      |                 |                | 405.8228               | 2                  | 0                           | 0                      |
| SUM149       | BREAST    |                        |                                  |                      |              |                 |                |                        |                    | 0                           | 0                      |
| SUM52        | BREAST    |                        |                                  |                      |              |                 |                |                        |                    | 0                           | 0                      |
| T47D         | BREAST    |                        |                                  | 9.600242             | 0.0838       |                 |                | 1474.012               | 3                  | 0                           | 0                      |
| VP229        | BREAST    |                        |                                  |                      |              |                 |                |                        |                    | 0                           | 0                      |
| ZR751        | BREAST    |                        |                                  | 8.592579             | 0.9041       |                 |                |                        |                    | 0                           | 0                      |
| MCF10A       | BREAST    |                        |                                  |                      |              |                 |                |                        |                    | 0                           | 0                      |
| MFM223       | BREAST    |                        |                                  |                      |              |                 |                | 1060                   | 2                  |                             | 0                      |
| CAL51        | BREAST    |                        |                                  | 7.276337             | -0.0055      |                 |                | 996.4421               | 2                  | 0                           | 0                      |
| BT549        | BREAST    |                        |                                  | 4.587023             | 0.0331       |                 |                | 18.20013               | 2                  | 1                           | 1                      |
| CAL120       | BREAST    |                        |                                  | 7.52427              | -0.0577      |                 |                | 69.7                   | 3                  | 1                           | 1                      |
| HS578T       | BREAST    |                        |                                  | 4.442452             | -0.3383      |                 |                | 1.92                   | 2                  | 1                           | 1                      |
| MDAMB134     | BREAST    | p.L230_P277del         | c.688_832del                     | 6.35283              | -0.9568      |                 |                |                        |                    | 1                           | 1                      |
| MDAMB157     | BREAST    |                        |                                  | 4.102815             | -0.1466      |                 |                | 12.1                   | 4                  | 1                           | 1                      |
| MDAMB231     | BREAST    |                        |                                  | 4.229351             | -0.3833      |                 |                | 14.50108               | 2                  | 1                           | 1                      |
| MDAMB436     | BREAST    |                        |                                  | 4.367926             | -0.5437      |                 |                |                        |                    | 1                           | 1                      |
| MDAMB453     | BREAST    | p.W638*                | c.1913G>A<br>Homozygous deletion | 6.867313             | -0.4483      | p.W638*         | c.1913G>A      | 79.1                   | 3                  | 1                           | 1                      |
| SKBR3        | BREAST    |                        |                                  | 4.490762             | -5.279       |                 |                |                        |                    | 1                           | 1                      |
| SUM159       | BREAST    |                        |                                  |                      |              |                 |                |                        |                    | 1                           | 1                      |
| SUM44        | BREAST    | p.F423fs*8             | c.1269delT                       |                      |              |                 |                |                        |                    | 1                           | 1                      |
| ZR7530       | BREAST    | p.E243*                | c.727G>T                         | 5.859798             | -0.7924      | p.E243*         | c.727G>T       | 54.3                   | 2                  | 1                           | 1                      |

**Supplementary Table S6 Synthetic lethality in E-cadherin defective breast tumour cell line models.** The difference in Z-score data of median of E-cadherin defective and median of wt. groups are shown.

**grpA = E-cadherin defective**  
**grpB = E-cadherin wild type**

| target    | med.grpA | med.grpB | med.grpA-<br>med.grpB | min.grpA | min.grpB | mptest.p |
|-----------|----------|----------|-----------------------|----------|----------|----------|
| CDC42BPA  | -2.64178 | -0.57188 | -2.06990              | -5.37019 | -5.52563 | 0.002    |
| PLK4      | -2.21741 | -1.17528 | -1.04213              | -6.17464 | -5.27888 | 0.025    |
| MAPKAPK3  | -2.07782 | -1.04596 | -1.03186              | -3.64434 | -3.02670 | 0.003    |
| GSK3A     | -1.47758 | -0.53077 | -0.94681              | -6.62653 | -2.90063 | 0.026    |
| ROS1      | -0.93360 | 0.00883  | -0.94242              | -3.35439 | -1.85628 | 0.04     |
| ROCK2     | -0.26440 | 0.58160  | -0.84599              | -0.70468 | -0.78533 | 0.001    |
| PSKH2     | -0.80327 | 0.01788  | -0.82095              | -2.50469 | -1.55815 | 0.016    |
| RELA      | -1.72711 | -0.92667 | -0.80044              | -3.06619 | -3.10870 | 0.051    |
| STK16     | -0.49386 | 0.28049  | -0.77436              | -1.27060 | -2.34356 | 0.019    |
| STK33     | -0.39610 | 0.33121  | -0.72731              | -2.64870 | -1.48138 | 0.034    |
| EPHB3     | -0.84407 | -0.12037 | -0.72370              | -2.01908 | -2.13862 | 0.003    |
| PRKCA     | -1.15198 | -0.43134 | -0.72064              | -1.87986 | -4.19953 | 0.013    |
| DUSP21    | 0.04199  | 0.73586  | -0.69388              | -1.05426 | -0.30027 | 0.009    |
| HRI       | -0.27956 | 0.39963  | -0.67918              | -1.45645 | -1.25856 | 0.04     |
| AAK1      | -0.67495 | -0.01526 | -0.65970              | -2.49785 | -0.87453 | 0.008    |
| STK23     | -0.37167 | 0.28025  | -0.65192              | -0.65074 | -1.72014 | 0.052    |
| HIPK2     | -0.09839 | 0.54787  | -0.64626              | -2.99720 | -1.25732 | 0.028    |
| TEC       | 0.14326  | 0.78498  | -0.64172              | -1.34624 | 0.05313  | 0.027    |
| PIK3R2    | -0.49107 | 0.12405  | -0.61512              | -2.67861 | -0.53011 | 0.008    |
| MAP3K7IP1 | 0.10123  | 0.70366  | -0.60243              | -0.55046 | -0.71759 | 0.043    |
| SNF1LK    | 0.05268  | 0.65430  | -0.60162              | -1.45619 | -0.51718 | 0.037    |
| ACVR2     | 0.05574  | 0.64468  | -0.58893              | -1.76541 | -1.16943 | 0.047    |
| TAO1      | -0.18255 | 0.38160  | -0.56415              | -1.51591 | -0.76176 | 0.017    |
| PRKAG2    | 0.21464  | 0.75624  | -0.54160              | -0.89369 | -0.54274 | 0.038    |
| YES1      | -0.33304 | 0.19853  | -0.53157              | -1.62334 | -1.21128 | 0.032    |
| CDKN2B    | 0.39549  | 0.92686  | -0.53136              | -0.68004 | 0.12244  | 0.008    |
| ZAK       | 0.16561  | 0.68305  | -0.51744              | -0.80647 | -1.00769 | 0.003    |
| IRAK4     | 0.10837  | 0.58922  | -0.48085              | -1.02341 | -0.99621 | 0.047    |
| CAMK1G    | 0.32019  | 0.78996  | -0.46977              | -0.80620 | -0.36789 | 0.035    |
| DYRK1A    | -0.24752 | 0.19443  | -0.44195              | -1.10156 | -2.35672 | 0.026    |
| CHEK2     | 0.23970  | 0.63783  | -0.39812              | -0.97307 | -1.14818 | 0.009    |



**Supplementary Table S7 Synthetic lethality in E-cadherin defective mixed histology tumour cell line models.** The difference in Z-score data of median of E-cadherin defective and median of wt. groups are shown.

| grpA = E-cadherin defective |           | grpB = E-cadherin wild type |                       |            |           |           |
|-----------------------------|-----------|-----------------------------|-----------------------|------------|-----------|-----------|
| target                      | med.grpA  | med.grpB                    | med.grpA-<br>med.grpB | min.grpA   | min.grpB  | mpitest.p |
| TGFBFR2                     | -1.243274 | 0.138601                    | -1.381875             | -2.997574  | -2.562569 | 0         |
| KSR1                        | -1.679058 | -0.418926                   | -1.260132             | -5.513046  | -4.779142 | 0         |
| STK39                       | -2.452338 | -1.247593                   | -1.204745             | -6.440513  | -5.665470 | 0.007     |
| PI4KA                       | -0.926708 | 0.164015                    | -1.090723             | -2.970935  | -2.165499 | 0         |
| PTK7                        | -2.165658 | -1.119660                   | -1.045998             | -8.527493  | -6.414201 | 0.034     |
| GALK2                       | -1.325077 | -0.406614                   | -0.918463             | -6.318603  | -3.502433 | 0.047     |
| ERN1                        | -1.118289 | -0.220308                   | -0.897981             | -5.740674  | -3.347093 | 0.039     |
| DGCR14                      | -0.730032 | 0.094997                    | -0.825029             | -4.693139  | -2.202150 | 0.004     |
| DGKI                        | -0.058328 | 0.750789                    | -0.809117             | -4.511130  | -1.777454 | 0         |
| PDGFRA                      | -0.502712 | 0.305059                    | -0.807771             | -2.788124  | -1.922740 | 0.001     |
| ADRBK1                      | -0.971987 | -0.170078                   | -0.801909             | -2.185112  | -3.181181 | 0.015     |
| PDK4                        | -0.660132 | 0.135210                    | -0.795342             | -3.948641  | -2.708407 | 0.008     |
| TEX14                       | -0.742206 | 0.046444                    | -0.788650             | -3.555046  | -2.051626 | 0.026     |
| NEK8                        | -1.920802 | -1.156006                   | -0.764796             | -4.725576  | -5.894615 | 0.047     |
| CSNK2B                      | -1.480697 | -0.724058                   | -0.756639             | -4.335044  | -3.696255 | 0.002     |
| HIFK2                       | -0.237391 | 0.502075                    | -0.739466             | -2.205681  | -1.609760 | 0.002     |
| DGKQ                        | -1.654679 | -0.943299                   | -0.711380             | -11.845917 | -5.255620 | 0.012     |
| ACVR2B                      | -0.631440 | 0.075280                    | -0.706720             | -3.556247  | -2.754110 | 0.02      |
| RELA                        | -2.065871 | -1.381996                   | -0.683875             | -5.379719  | -3.322088 | 0.025     |
| TESK1                       | -0.694235 | -0.052710                   | -0.641525             | -3.121612  | -1.827845 | 0.004     |
| STK33                       | -0.926057 | -0.285008                   | -0.641049             | -4.497377  | -1.866116 | 0         |
| RP86KA5                     | -0.857149 | -0.232182                   | -0.624967             | -2.728001  | -2.498135 | 0.042     |
| DYRK1B                      | 0.056933  | 0.675336                    | -0.618404             | -1.190798  | -1.486860 | 0.003     |
| MARK3                       | -1.465187 | -0.851111                   | -0.614076             | -7.416331  | -3.089232 | 0.008     |
| TSSK3                       | -1.078410 | -0.474033                   | -0.604377             | -3.631533  | -2.452670 | 0.007     |
| PRKDC                       | -0.883021 | -0.279376                   | -0.603645             | -4.243728  | -2.543423 | 0.013     |
| MAP2K1                      | -0.150412 | 0.451418                    | -0.601830             | -2.007355  | -1.758468 | 0.008     |
| PAP8S2                      | -0.116934 | 0.482086                    | -0.599020             | -2.160100  | -1.224303 | 0.011     |
| SYK                         | -1.216762 | -0.621014                   | -0.595747             | -5.717837  | -3.609074 | 0.018     |
| DMPK                        | -0.846393 | -0.303005                   | -0.543388             | -2.510067  | -2.156521 | 0.03      |
| PIK3R5                      | -0.692260 | -0.149402                   | -0.542858             | -3.593491  | -2.271940 | 0.05      |
| PFKFB4                      | -0.431352 | 0.101159                    | -0.532512             | -2.910369  | -2.006308 | 0.029     |
| ABL2                        | -0.291865 | 0.222316                    | -0.514181             | -3.027379  | -2.202006 | 0.032     |
| PRKCH                       | -1.231438 | -0.734734                   | -0.496704             | -7.005438  | -4.782421 | 0.01      |
| ROB1                        | -0.865455 | -0.369936                   | -0.495519             | -4.880350  | -1.922964 | 0.018     |
| INSR                        | -0.841129 | -0.359606                   | -0.481523             | -5.000156  | -2.754405 | 0.017     |
| SGK4S4                      | 0.000530  | 0.462871                    | -0.462341             | -1.779279  | -2.218415 | 0.047     |
| RP86KL1                     | -1.100377 | -0.641046                   | -0.459330             | -5.578052  | -4.386062 | 0.023     |
| RNASEL                      | 0.001219  | 0.446264                    | -0.445044             | -1.725733  | -0.762448 | 0.038     |
| SPHK1                       | -0.662750 | -0.229248                   | -0.433501             | -2.856694  | -3.705312 | 0.024     |
| CDKL2                       | -0.553056 | -0.149727                   | -0.403329             | -3.325781  | -2.094427 | 0.023     |
| IKBKAP                      | 0.228990  | 0.631039                    | -0.402049             | -1.438710  | -1.067847 | 0.047     |
| CDK5                        | -0.193360 | 0.205544                    | -0.398904             | -2.385988  | -1.410798 | 0.031     |
| PANK2                       | -0.075430 | 0.320886                    | -0.396316             | -2.204769  | -0.351271 | 0.015     |
| ATR                         | -0.824295 | -0.434661                   | -0.389635             | -3.210269  | -2.610254 | 0.054     |
| CKS1B                       | 0.140897  | 0.524611                    | -0.383714             | -1.652039  | -1.220660 | 0.018     |
| ITPKC                       | 0.154354  | 0.521787                    | -0.367433             | -1.623605  | -0.680141 | 0.034     |
| EIF2AK3                     | 0.543862  | 0.321654                    | 0.222208              | -1.818900  | -2.604610 | 0.024     |
| RIPK3                       | 0.430480  | 0.186146                    | 0.244334              | -0.895032  | -1.853933 | 0.053     |
| PAK6                        | 0.569676  | 0.260049                    | 0.309627              | -0.763488  | -2.366362 | 0.029     |
| MAST1                       | -0.149406 | -0.475622                   | 0.326215              | -2.242699  | -3.619800 | 0.017     |
| MAK                         | 0.177387  | -0.152060                   | 0.329447              | -0.873301  | -2.391710 | 0.04      |
| BMX                         | 0.734513  | 0.402102                    | 0.332411              | -1.213764  | -1.243430 | 0.044     |
| GK2                         | 0.584713  | 0.251732                    | 0.332980              | -0.651581  | -1.316440 | 0.046     |
| MLTK                        | 0.847545  | 0.489719                    | 0.357826              | -1.490000  | -1.173233 | 0.019     |
| CAMKK1                      | 0.873687  | 0.514153                    | 0.359534              | -0.218984  | -6.484650 | 0.05      |
| FXN                         | 0.824474  | 0.460452                    | 0.364022              | -0.107796  | -1.000000 | 0.041     |
| STK10                       | 0.225717  | -0.140088                   | 0.365806              | -1.385076  | -2.225885 | 0.023     |
| DLG2                        | 0.899179  | 0.526510                    | 0.372669              | -0.990287  | -1.250076 | 0.031     |
| RYK                         | 0.841602  | 0.445273                    | 0.396329              | -0.961652  | -0.922224 | 0.011     |
| CHKB                        | 0.708232  | 0.309908                    | 0.398324              | -0.826940  | -1.492716 | 0.011     |
| TLK2                        | 0.641715  | 0.242506                    | 0.399208              | -0.463055  | -1.942379 | 0.046     |
| XRCC6BP1                    | 0.408797  | -0.012229                   | 0.421026              | -1.716343  | -1.373838 | 0.038     |
| ITPKB                       | 0.010137  | -0.418758                   | 0.428895              | -0.967109  | -2.516106 | 0.029     |
| COMMD3                      | -0.423298 | -0.872774                   | 0.449476              | -3.024309  | -4.354284 | 0.038     |
| GRK1                        | 0.636621  | 0.172336                    | 0.464285              | -1.054254  | -1.010654 | 0.01      |
| CAMK2G                      | 0.520000  | 0.029266                    | 0.490734              | -2.765941  | -6.807591 | 0.001     |
| PIK3CD                      | 0.445943  | -0.047794                   | 0.493736              | -2.420122  | -2.552814 | 0.004     |
| PI4K2A                      | 0.613821  | 0.112399                    | 0.501422              | -1.113786  | -2.302300 | 0.012     |
| CDKL5                       | 0.488426  | -0.020762                   | 0.509188              | -2.401872  | -5.030140 | 0.029     |
| RFK                         | 0.562565  | 0.051000                    | 0.511565              | -11.218788 | -3.239306 | 0.012     |
| PAK3                        | -0.079431 | -0.591682                   | 0.512251              | -2.787965  | -1.583351 | 0.037     |
| BLK                         | 0.744972  | 0.229039                    | 0.515934              | -1.095004  | -1.667110 | 0.019     |
| XYLB                        | 0.485913  | -0.049250                   | 0.535163              | -0.814253  | -1.881183 | 0.01      |
| MAP4K2                      | -0.122674 | -0.686796                   | 0.564122              | -6.431871  | -3.729617 | 0.019     |
| SCYL3                       | -0.212622 | -0.792468                   | 0.579846              | -1.852586  | -3.104754 | 0.005     |
| PRKCD                       | 0.020193  | -0.569268                   | 0.589461              | -1.982389  | -3.635411 | 0.026     |
| PRKCE                       | 0.175195  | -0.429886                   | 0.605081              | -2.068204  | -2.601848 | 0.02      |
| FLT1                        | 0.541576  | -0.065291                   | 0.606867              | -0.687280  | -1.980176 | 0.012     |
| PIK3CA                      | 0.632857  | 0.009453                    | 0.623404              | -2.095434  | -3.346469 | 0.041     |
| PRKACB                      | 0.416099  | -0.283455                   | 0.698555              | -0.786927  | -4.714100 | 0         |
| NRBP1                       | -0.154554 | -0.867996                   | 0.713442              | -6.646961  | -3.689409 | 0.014     |
| MAP3K2                      | 0.997364  | 0.235848                    | 0.761516              | -9.240182  | -4.313790 | 0         |



**Supplementary Table S8 Individual area under the curve (AUC) and surviving fraction 50 (SF<sub>50</sub>) values of foretinib or crizotinib in 12 breast tumour cell lines.**

| Cell line name | E-cadherin Defective/WT | IC50              |                    | AUC       |            |
|----------------|-------------------------|-------------------|--------------------|-----------|------------|
|                |                         | foretinib $\mu$ M | crizotinib $\mu$ M | foretinib | crizotinib |
| SKBR3          | Defective               | 0.013833975       | 0.016801266        | 1.088     | 1.3        |
| SUM44          | Defective               | 0.042514101       | 0.032861168        | 1.112     | 1.162      |
| CAL120         | Defective               | 0.228411249       | 0.95616975         | 1.574     | 2.101      |
| BT549          | Defective               | 0.251779867       | 0.995070841        | 1.492     | 1.939      |
| MDAMB157       | Defective               | 0.828827209       | 2.943459062        | 2.08      | 2.532      |
| MDAMB231       | Defective               | 0.918108483       | 1.623166235        | 2.15      | 2.411      |
| MFM223         | WT                      | 0.742138585       | 2.353282147        | 1.941     | 2.432      |
| T47D           | WT                      | 1.010231718       | 1.010231718        | 2.04      | 2.04       |
| SUM149         | WT                      | 1.103171415       | 3.184439483        | 2.674     | 2.563      |
| MCF7           | WT                      | 2.309787358       | 2.369119678        | 2.794     | 2.848      |
| MCF12A         | WT                      | 2.461943036       | 3.460987255        | 2.678     | 2.904      |
| MCF10A         | WT                      | 2.682402839       | 3.772671576        | 2.673     | 2.981      |

Supplementary Table S9 ROS1 genomic alterations in breast tumour cell lines.

| Cell line name    | E-cadherin status                          | ROS1 fusions data by Klijn et al 2015 | CCLE/COSMIC ROS1 amplifications/deletions | COSMIC ROS1 mutations | CCLE ROS1 mutations |
|-------------------|--------------------------------------------|---------------------------------------|-------------------------------------------|-----------------------|---------------------|
| BT20_BREAST       | E-cadherin wild type                       | not detected                          | AMP                                       | not detected          | p.D618E             |
| BT474_BREAST      | E-cadherin wild type                       | not detected                          | not detected                              | p.V1916L              | p.V1916L            |
| BT549_BREAST      | E-cadherin defective                       | not detected                          | not detected                              | not detected          | not detected        |
| CAL120_BREAST     | E-cadherin defective                       | not detected                          | not detected                              | not detected          | not detected        |
| CAL51_BREAST      | E-cadherin wild type                       | not detected                          | not detected                              | not detected          | not detected        |
| CAMA1_BREAST      | E-cadherin wild type                       | not detected                          | not detected                              | not detected          | not detected        |
| DU4475_BREAST     | E-cadherin wild type                       | not detected                          | not detected                              | not detected          | not detected        |
| HCC1143_BREAST    | E-cadherin wild type                       | not detected                          | not detected                              | not detected          | not detected        |
| HCC1954_BREAST    | E-cadherin wild type                       | not detected                          | not detected                              | not detected          | not detected        |
| HCC202_BREAST     | E-cadherin wild type                       | not detected                          | not detected                              | not detected          | not detected        |
| HCC38_BREAST      | E-cadherin wild type                       | not detected                          | not detected                              | not detected          | not detected        |
| HCC70_BREAST      | E-cadherin wild type                       | not detected                          | not detected                              | not detected          | not detected        |
| HMT3552_BREAST    | E-cadherin wild type                       | not assessed                          | not detected                              | not detected          | not detected        |
| HS578T_BREAST     | E-cadherin defective                       | not detected                          | not detected                              | not detected          | not detected        |
| JIMT1_BREAST      | E-cadherin wild type                       | not detected                          | not detected                              | not detected          | not detected        |
| MCF10A_BREAST     | E-cadherin wild type                       | not detected                          | not detected                              | not detected          | not detected        |
| MCF12A_BREAST     | E-cadherin wild type                       | not assessed                          | not detected                              | not detected          | not detected        |
| MCF7_BREAST       | E-cadherin wild type                       | not detected                          | not detected                              | not detected          | not detected        |
| MDAMB134VI_BREAST | E-cadherin defective                       | not detected                          | not detected                              | not detected          | not detected        |
| MDAMB157_BREAST   | E-cadherin defective                       | not detected                          | not detected                              | not detected          | not detected        |
| MDAMB231_BREAST   | E-cadherin defective                       | not detected                          | not detected                              | not detected          | not detected        |
| MDAMB436_BREAST   | E-cadherin defective                       | not detected                          | not detected                              | not detected          | not detected        |
| MDAMB453_BREAST   | E-cadherin defective                       | not detected                          | not detected                              | p.V1971V              | not detected        |
| MDAMB468_BREAST   | E-cadherin wild type                       | not detected                          | not detected                              | not detected          | not detected        |
| MFM223_BREAST     | E-cadherin wild type                       | not detected                          | not detected                              | not detected          | not detected        |
| SKBR3_BREAST      | E-cadherin defective                       | not detected                          | not detected                              | not detected          | not detected        |
| SUM 149_BREAST    | E-cadherin wild type                       | not detected                          | not detected                              | not detected          | not detected        |
| SUM 159_BREAST    | E-cadherin defective                       | not detected                          | not detected                              | not detected          | not detected        |
| SUM44_BREAST      | E-cadherin defective                       | not assessed                          | not detected                              | not detected          | not detected        |
| SUM S2_BREAST     | E-cadherin wild type                       | not detected                          | not detected                              | not detected          | not detected        |
| T47D_BREAST       | E-cadherin wild type                       | not detected                          | not detected                              | not detected          | not detected        |
| VP229_BREAST      | E-cadherin wild type                       | not assessed                          | not detected                              | not detected          | not detected        |
| ZR751_BREAST      | E-cadherin wild type                       | not detected                          | HOMDEL                                    | not detected          | not detected        |
| ZR7530_BREAST     | E-cadherin defective                       | not detected                          | not detected                              | not detected          | p.K2099N            |
| HCC78             | Control cell line harbouring a ROS1 fusion | SLC34A2-ROS1                          |                                           |                       |                     |

**Supplementary Table S10 Small molecule inhibitor library.** List of 80 compounds and their molecular targets.

| Drugs               | Target          | Company                     | Clinical Stage |
|---------------------|-----------------|-----------------------------|----------------|
| 4-OH-TAMOXIFEN      | ER              | Off patent generic drug     | Licensed       |
| 5-FU                | DNA             | Off patent generic drug     | Licensed       |
| 6-THIOGUANINE       | DNA             | GSK                         | Licensed       |
| ABIRATERONE         | CYP17A1         | J and J                     | Licensed       |
| BIBW2992            | EGFR/ERBB2      | Boehringer Ingelheim        | Licensed       |
| BLEOMYCINSULFATE    | DNA             | BMS                         | Licensed       |
| CABOZANTINIB        | cMET,VEGFR      | Exelixis                    | Licensed       |
| CAMPTOTHECIN        | TOP2olpolsion   | Off patent generic drug     | Licensed       |
| CARBOPLATIN         | DNA             | BMS                         | Licensed       |
| CELECOXIB           | COX2            | Pfizer                      | Licensed       |
| DASATINIB           | SRC             | BMS                         | Licensed       |
| DECITABINE          | DNA             | Janssen-Cilag               | Licensed       |
| DOXORUBICIN.HCL     | DNA             | Off patent generic drug     | Licensed       |
| ERLOTINIB           | EGFR            | Genentech                   | Licensed       |
| ETOPOSIDE           | Topoisomerase   | Off patent generic drug     | Licensed       |
| EVEROLIMUS          | mTOR            | Novartis                    | Licensed       |
| GDC-0449            | Hedgehog        | Genentech                   | Licensed       |
| GEFITINIB           | EGFR            | AZ                          | Licensed       |
| GEMCITABINE.HCL     | DNA             | Eli Lilly                   | Licensed       |
| IMATINIBMESYLATE    | ABL             | Novartis                    | Licensed       |
| MDV-3100            | AR              | Medivation                  | Licensed       |
| METHOTREXATE        | DHFR            | Off patent generic drug     | Licensed       |
| nilotinib           | ABL             | Novartis                    | Licensed       |
| olaparib            | PARP1/2         | AZ                          | Licensed       |
| paclitaxel          | Microtubules    | Off patent generic drug     | Licensed       |
| PLX-4720            | BRAF            | Plexicon                    | Licensed       |
| sorafenib           | VEGF, PDGFR     | Bayer                       | Licensed       |
| sunitinib           | RTKs            | Pfizer                      | Licensed       |
| temozolomide        | DNA             | Schering                    | Licensed       |
| vinorelbine         | Microtubules    | Off patent generic drug     | Licensed       |
| voronostat          | HDACs           | Merck                       | Licensed       |
| MK-1175             | WEE1            | Merck                       | Phase 1        |
| MLN-4924            | NAE             | Millenium                   | Phase 1        |
| Nutlin3             | p53             | Roche                       | Phase 1        |
| PF-00477736         | CHEK1           | Pfizer                      | Phase 1        |
| PF-03758309         | PAK4            | Pfizer                      | Phase 1        |
| PF-04929113         | HSP             | Pfizer                      | Phase 1        |
| SAR-20106           | CHKs            | ICR                         | Phase 1        |
| BI-2536             | PLK1            | Boehringer Ingelheim        | Phase 2        |
| 17-AAG              | HSP90           | BMS                         | Phase 2        |
| 2-METHOXYESTRADIOL  | ER              | Entremed                    | Phase 2        |
| ABT-737             | BCL2            | Abbott                      | Phase 2        |
| AZ4547              | FGFRs           | AZ                          | Phase 2        |
| BEZ-235             | mTOR/PI3K       | Novartis                    | Phase 2        |
| BMN-673             | PARP1/2         | Blomarin                    | Phase 2        |
| BMS-911543          | JAK2            | BMS                         | Phase 2        |
| CANERTINIB          | panERBB         | Pfizer                      | Phase 2        |
| FLAVOPIRIDOL        | CDKs            | Sanofi                      | Phase 2        |
| FORETINIB           | cMET, VEGFR     | Exelixis/GSK                | Phase 2        |
| LESTAURTINIB        | JAK             | Cephalon                    | Phase 2        |
| MK0752              | Gamma Secretase | Merck                       | Phase 2        |
| MK2206              | AKT             | Merck                       | Phase 2        |
| PF-00299804         | EGFR            | Pfizer                      | Phase 2        |
| PF-03814735         | AURK            | Pfizer                      | Phase 2        |
| AG-14699            | PARP1/2         | Pfizer/Clovis               | Phase 3        |
| CRIZOTINIB          | ALK,ROS1        | Pfizer                      | Phase 3        |
| LAPATINIB           | ERBB            | GSK                         | Phase 3        |
| LENVATINIB          | VEGF            | Elsal                       | Phase 3        |
| OSI-906             | IGF1R           | OSI                         | Phase 3        |
| PD-0332991          | CDK4/6          | Pfizer                      | Phase 3        |
| PF-02341066         | MET/ALK         | Pfizer                      | Phase 3        |
| PF-04691502         | PI3K            | Pfizer                      | Phase 3        |
| PF-332991           | CDK4/6          | Pfizer                      | Phase 3        |
| Sapacitabine        | DNA             | Medivation                  | Phase 3        |
| ICR_1783            | Tankyrase       | ICR                         | Pre-clinical   |
| ICR_1913            | Tankyrase       | ICR                         | Pre-clinical   |
| GSK-2334470A        | PDK1            | GSK                         | Pre-clinical   |
| GSK1904529A         | IGF1R           | GSK                         | Pre-clinical   |
| GSK2194069A         | FASN            | GSK                         | Pre-clinical   |
| KU0057788           | DNAPKCs         | AZ                          | Pre-clinical   |
| KU60019             | ATM             | AZ                          | Pre-clinical   |
| M8C2358705A         | DNA-PKl         | Merck                       | Pre-clinical   |
| PD-184352           | MEK             | Pfizer                      | Pre-clinical   |
| PD173074            | FGFRs           | Pfizer                      | Pre-clinical   |
| resveratrol         | SIRT6           | Off patent                  | Pre-clinical   |
| RO-3306             | CDKs            | Off patent                  | Pre-clinical   |
| salinomycin         | n/k             | Off patent                  | Pre-clinical   |
| Sotrastaurin/AEB071 | PKC             | Novartis                    | Pre-clinical   |
| XAV-939             | Tankyrase       | Novartis                    | Pre-clinical   |
| YM155               | Survivin        | positive control for screen |                |

**Supplementary Table S11 Summary of antibodies used in this study.** This table lists the antibodies used, supplier and antibody dilution.

| <b>Antibody</b>                      | <b>Supplier</b>         | <b>Product Number</b> | <b>Dilution</b> |
|--------------------------------------|-------------------------|-----------------------|-----------------|
| E-cadherin                           | Cell signalling         | 3195                  | 1/1000          |
| ACTIN                                | Santa Cruz              | sc-1616               | 1/1000          |
| EZRIN                                | Cell signalling         | 3145                  | 1/1000          |
| $\alpha$ Tubulin                     | Santa Cruz              | sc-5286               | 1/1000          |
| Phalloidin                           | ThermoFisher Scientific | A12379                | 1/500           |
| MRCK $\alpha$                        | GeneTex                 | GTX102598             | 1/1000          |
| pH2AX                                | Millipore               | 05-636                | 1/1000          |
| MKLP1                                | Santa Cruz              | SC-857                | 1/200           |
| Catenin $\delta$ -1 Antibody         | Cell signalling         | 4989                  | 1/1000          |
| Phospho-Catenin $\delta$ -1 (Tyr228) | Cell signalling         | 2911                  | 1/1000          |
| Phospho-Catenin $\delta$ -1 (Ser320) | Cell signalling         | 8016                  | 1/1000          |
| PARP1                                | Santa Cruz              | sc-8007               | 1/200           |
| p21                                  | Cell signalling         | 2947                  | 1/1000          |
| anti-FLAG                            | Sigma-Aldrich           | F3165                 | 1/1000          |
| ROS1                                 | Cell signalling         | 3287                  | 1/1000          |
| anti-p120                            | BD Biosciences          | 610134                | 1/500           |
| MET                                  | Cell signalling         | 8198                  | 1/1000          |
| ALK                                  | Cell signalling         | 3633                  | 1/1000          |
| Akt                                  | Cell signalling         | 9272                  | 1/1000          |
| Phospho-Akt (Ser473)                 | Cell signalling         | 4080                  | 1/1000          |
| Phospho-p44/42 MAPK                  | Cell signalling         | 4370                  | 1/1000          |
| p44/42 MAPK                          | Cell signalling         | 4895                  | 1/1000          |
| Phospho-ROS1 (Tyr2274)               | Cell signalling         | 3078                  | 1/1000          |
